# Supplementary material for: Assessment of haemoglobin and serum markers of iron deficiency in people with cardiovascular disease
Source: PubMed Central journal article supplement (PMC10423540; doi:10.1136/heartjnl-2022-322145), 2023-05-02
Supplement: heartjnl-2022-322145supp001.pdf [file heartjnl-2022-322145supp001.pdf]

## Supplementary Material

The following R packages formed the backbone of the statistical analysis: tidyverse (1), survival (2), RODBC (3), viridis (4), cmprsk (5), lubridate (6), survminer (7), broom (8), reshape2 (9), ggfortify (10), gridExtra (11), forcats (12), and ggpubr (13).

**Table S1** Database and codes used to generate the cohort. Patients were included based the existence of a record across at least one of community-based prescriptions and primary care, hospital admission records, and mental health inpatient and day cases care records between 31<sup>st</sup> December 2009 through 31<sup>st</sup> March 2018.

Codes are listed based on the formatting used within Safe Haven and unless explicitly noted otherwise, three and four digit ICD-10 codes include all codes below them. BNF codes include all codes below them.

| Dataset                                                                                                                                                                                                                                                                                                                                                                                                                                                                                                                                                                                                                                             | Code Type | Variable     | Code    | Description                                                          |
|-----------------------------------------------------------------------------------------------------------------------------------------------------------------------------------------------------------------------------------------------------------------------------------------------------------------------------------------------------------------------------------------------------------------------------------------------------------------------------------------------------------------------------------------------------------------------------------------------------------------------------------------------------|-----------|--------------|---------|----------------------------------------------------------------------|
| SMR01/04                                                                                                                                                                                                                                                                                                                                                                                                                                                                                                                                                                                                                                            | ICD-10    | PAD          | I73     | Other peripheral vascular disease                                    |
| SMR01/04                                                                                                                                                                                                                                                                                                                                                                                                                                                                                                                                                                                                                                            | ICD-10    | CAD          | I24     | Other Acute ischaemic heart disease                                  |
| SMR01/04                                                                                                                                                                                                                                                                                                                                                                                                                                                                                                                                                                                                                                            | ICD-10    | CAD          | I254    | Coronary artery aneurism and dissection                              |
| SMR01/04                                                                                                                                                                                                                                                                                                                                                                                                                                                                                                                                                                                                                                            | ICD-10    | CAD          | Z951    | Presence of aortocoronary bypass graft                               |
| SMR01/04                                                                                                                                                                                                                                                                                                                                                                                                                                                                                                                                                                                                                                            | ICD-10    | CAD          | Z955    | Presence of coronary angioplasty implant and graft                   |
| SMR01/04                                                                                                                                                                                                                                                                                                                                                                                                                                                                                                                                                                                                                                            | ICD-10    | HF           | I50     | Heart failure                                                        |
| SMR01/04                                                                                                                                                                                                                                                                                                                                                                                                                                                                                                                                                                                                                                            | ICD-10    | HF           | I110    | Hypertensive heart disease with (congestive) heart failure           |
| SMR01/04                                                                                                                                                                                                                                                                                                                                                                                                                                                                                                                                                                                                                                            | ICD-10    | HF           | I130    | Hypertensive heart and renal disease with (congestive) heart failure |
| GP LES                                                                                                                                                                                                                                                                                                                                                                                                                                                                                                                                                                                                                                              | Read      | PAD          | G734    | Echocardiogram shows left ventricular systolic dysfunction           |
| GP LES                                                                                                                                                                                                                                                                                                                                                                                                                                                                                                                                                                                                                                              | Read      | CAD          | G340    | Coronary artery disease (CAD)                                        |
| GP LES                                                                                                                                                                                                                                                                                                                                                                                                                                                                                                                                                                                                                                              | Read      | HF           | G5yy9   | Left ventricular systolic dysfunction (LVSD)                         |
| GP LES                                                                                                                                                                                                                                                                                                                                                                                                                                                                                                                                                                                                                                              | Read      | HF           | 585f    | Echocardiogram shows left ventricular systolic dysfunction           |
| GP LES                                                                                                                                                                                                                                                                                                                                                                                                                                                                                                                                                                                                                                              | LES Area  | HF           | 4       | Heart failure                                                        |
| PIS                                                                                                                                                                                                                                                                                                                                                                                                                                                                                                                                                                                                                                                 | BNF       | ACEi         | 0205051 | Angiotensin-converting-enzyme inhibitor (ACEi)                       |
| PIS                                                                                                                                                                                                                                                                                                                                                                                                                                                                                                                                                                                                                                                 | BNF       | ARB          | 0205025 | Angiotensin II receptor blocker (ARB)                                |
| PIS                                                                                                                                                                                                                                                                                                                                                                                                                                                                                                                                                                                                                                                 | BNF       | Beta-blocker | 0204    | Beta-blocker                                                         |
| PIS                                                                                                                                                                                                                                                                                                                                                                                                                                                                                                                                                                                                                                                 | BNF       | LD           | 020202  | Loop diuretics (LD)                                                  |
| PIS                                                                                                                                                                                                                                                                                                                                                                                                                                                                                                                                                                                                                                                 | BNF       | MRA          | 020203  | Mineralocorticoid receptor antagonists (MRA)                         |
| SMR01, Scottish Morbidity Records for Acute Inpatient and Day Cases; SMR04, Mental Health Inpatient and Day Cases; GP LES, General Practice Local Enhanced Services; PIS, Prescribing Information System for community-based prescriptions; LES Area, local enhanced service area; ICD-10, International Classification of Disease, 10 <sup>th</sup> Version; BNF, British National Formulary; PAD, peripheral arterial disease; CAD, coronary artery disease; HF, heart failure; ACEi, angiotensin-converting-enzyme inhibitor (ACEi); ARB, angiotensin II receptor blocker (ARB); LD, loop diuretic; MRA, mineralocorticoid receptor antagonists. |           |              |         |                                                                      |



**Table S2:** Description of how co-morbidities were defined and the data sources used to define them.

| Inclusion reason | Code type                 | Code                                                   | Description                                                  |
|------------------|---------------------------|--------------------------------------------------------|--------------------------------------------------------------|
| HF               | See supplementary table 3 |                                                        | Heart Failure                                                |
| ARB              | See supplementary table 5 |                                                        | Angiotensin II receptor blockers                             |
| ACEi             | See supplementary table 5 |                                                        | Angiotensin-converting-enzyme inhibitors                     |
| LD               | See supplementary table 5 |                                                        | Loop diuretics                                               |
| MRA              | See supplementary table 5 |                                                        | Mineralocorticoid-receptor antagonists.                      |
| Beta-blocker     | See supplementary table 5 |                                                        | Beta blockers                                                |
| PAD              | Read                      | 14F7                                                   | H/O: arterial lower limb ulcer                               |
|                  | Read                      | 14NB                                                   | H/O: Peripheral vascular disease procedure                   |
|                  | Read                      | 2G63                                                   | Ischaemic toe                                                |
|                  | Read                      | 7A100                                                  | Emerg aortic bypass by anastomosis axillary to femoral art   |
|                  | Read                      | 7A101                                                  | Bypass aorta by anastomosis axillary to femoral artery NEC   |
|                  | Read                      | 7A102                                                  | Axillo-bifemoral bypass graft                                |
|                  | Read                      | 7A103                                                  | Axillo-unifemoral PTFE bypass graft                          |
|                  | Read                      | 7A12.00                                                | Other bypass of bifurcation of aorta                         |
|                  | Read                      | 7A120                                                  | Emerg bypass bifurc aorta by anast aorta to femoral artery   |
|                  | Read                      | 7A121                                                  | Bypass bifurc aorta by anastom aorta to femoral artery NEC   |
|                  | Read                      | 7A12111                                                | Aorto bifemoral graft                                        |
|                  | Read                      | 7A12112                                                | Dacron aortofemoral Y graft                                  |
|                  | Read                      | 7A123                                                  | Bypass bifurcation aorta by anastom aorta to iliac artery    |
|                  | Read                      | 7A12311                                                | Aorto biiliac graft                                          |
|                  | Read                      | 7A12312                                                | Dacron aortoiliac Y graft                                    |
|                  | Read                      | 7A12y                                                  | Other specified other bypass of bifurcation of aorta         |
|                  | Read                      | 7A12z                                                  | Other bypass of bifurcation of aorta NOS                     |
|                  | Read                      | 7A192                                                  | Open embolectomy of bifurcation of aorta                     |
|                  | Read                      | 7A41                                                   | Other bypass of iliac artery                                 |
|                  | Read                      | 7A410                                                  | Emerg bypass iliac art by iliac/femoral art anastomosis NEC  |
|                  | Read                      | 7A411                                                  | Bypass iliac artery by iliac/femoral artery anastomosis NEC  |
|                  | Read                      | 7A412                                                  | Emerg bypass iliac artery by femoral/femoral art anast NEC   |
|                  | Read                      | 7A41211                                                | Emergency femoro-femoral prosthetic cross over graft         |
|                  | Read                      | 7A413                                                  | Bypass iliac artery by femoral/femoral art anastomosis NEC   |
|                  | Read                      | 7A41311                                                | Femoro-femoral prosthetic cross over graft                   |
|                  | Read                      | 7A414                                                  | Emerg bypass comm iliac art by aorta/com iliac art anast NEC |
|                  | Read                      | 7A416                                                  | Emerg bypass leg artery by aorta/com fem art anastomosis NEC |
|                  | Read                      | 7A419                                                  | Bypass common iliac artery by aorta/com iliac art anast NEC  |
|                  | Read                      | 7A41B                                                  | Bypass leg artery by aorta/com femoral art anastomosis NEC   |
|                  | Read                      | 7A41C                                                  | Bypass leg artery by aorta/deep femoral art anastomosis NEC  |
|                  | Read                      | 7A41F                                                  | Ilio-femoral prosthetic cross over graft                     |
|                  | Read                      | 7A41y                                                  | Other specified other bypass of iliac artery                 |
|                  | Read                      | 7A41z                                                  | Other bypass of iliac artery NOS                             |
| Read             | 7A42                      | Reconstruction of iliac artery                         |                                                              |
| Read             | 7A420                     | Endarterectomy and patch repair of iliac artery        |                                                              |
| Read             | 7A42011                   | Endarterectomy and patch repair of common iliac artery |                                                              |

|  |      |         |                                                              |
|--|------|---------|--------------------------------------------------------------|
|  | Read | 7A42012 | Iliac endarterectomy and patch                               |
|  | Read | 7A421   | Endarterectomy of iliac artery NEC                           |
|  | Read | 7A42111 | Endarterectomy of common iliac artery NEC                    |
|  | Read | 7A42y   | Other specified reconstruction of iliac artery               |
|  | Read | 7A42z   | Reconstruction of iliac artery NOS                           |
|  | Read | 7A43    | Other open operations on iliac artery                        |
|  | Read | 7A430   | Repair of iliac artery NEC                                   |
|  | Read | 7A43011 | Repair of common iliac artery NEC                            |
|  | Read | 7A431   | Open embolectomy of iliac artery                             |
|  | Read | 7A43111 | Open embolectomy of common iliac artery                      |
|  | Read | 7A433   | Open insertion of iliac artery stent                         |
|  | Read | 7A440   | Percutaneous transluminal angioplasty of iliac artery        |
|  | Read | 7A441   | Percutaneous transluminal embolectomy of iliac artery        |
|  | Read | 7A443   | Insertion of iliac artery stent                              |
|  | Read | 7A444   | Percutaneous transluminal insertion of iliac artery stent    |
|  | Read | 7A44y   | Other specified transluminal operation on iliac artery       |
|  | Read | 7A44z   | Transluminal operation on iliac artery NOS                   |
|  | Read | 7A47    | Other emergency bypass of femoral artery or popliteal artery |
|  | Read | 7A470   | Emerg bypass femoral art by fem/pop art anast c prosth NEC   |
|  | Read | 7A471   | Emerg bypass popliteal art by pop/pop art anast c prosth NEC |
|  | Read | 7A472   | Emerg bypass femoral art by fem/pop a anast c vein graft NEC |
|  | Read | 7A473   | Emerg bypass pop art by pop/pop art anast c vein graft NEC   |
|  | Read | 7A474   | Emerg bypass femoral art by fem/tib art anast c prosth NEC   |
|  | Read | 7A476   | Emerg bypass femoral art by fem/tib a anast c vein graft NEC |
|  | Read | 7A477   | Emerg bypass pop art by pop/tib art anast c vein graft NEC   |
|  | Read | 7A47B   | Emerg bypass pop art by pop/peron art anast c vein graft NEC |
|  | Read | 7A47C   | Emerg bypass femoral artery by fem/fem art anastomosis NEC   |
|  | Read | 7A47D   | Emerg bypass popliteal artery by pop/fem art anastomosis NEC |
|  | Read | 7A47y   | Other emergency bypass of femoral or popliteal artery OS     |
|  | Read | 7A47z   | Other emergency bypass of femoral or popliteal artery NOS    |
|  | Read | 7A48    | Other bypass of femoral artery or popliteal artery           |
|  | Read | 7A480   | Bypass femoral artery by fem/pop art anast c prosthesis NEC  |
|  | Read | 7A481   | Bypass popliteal artery by pop/pop a anast c prosthesis NEC  |
|  | Read | 7A482   | Bypass femoral artery by fem/pop art anast c vein graft NEC  |
|  | Read | 7A483   | Bypass popliteal artery by pop/pop a anast c vein graft NEC  |
|  | Read | 7A484   | Bypass femoral artery by fem/tib art anast c prosthesis NEC  |
|  | Read | 7A485   | Bypass popliteal artery by pop/tib a anast c prosthesis NEC  |
|  | Read | 7A486   | Bypass femoral artery by fem/tib art anast c vein graft NEC  |
|  | Read | 7A487   | Bypass popliteal artery by pop/tib a anast c vein graft NEC  |
|  | Read | 7A488   | Bypass femoral artery by fem/peron a anast c prosthesis NEC  |
|  | Read | 7A48A   | Bypass femoral artery by fem/peron a anast c vein graft NEC  |
|  | Read | 7A48B   | Bypass popliteal art by pop/peron art anast c vein graft NEC |
|  | Read | 7A48C   | Bypass femoral artery by femoral/femoral art anastomosis NEC |
|  | Read | 7A48D   | Bypass popliteal artery by pop/fem artery anastomosis NEC    |
|  | Read | 7A48E   | Femoro-femoral prosthetic cross over graft                   |
|  | Read | 7A48y   | Other bypass of femoral artery or popliteal artery OS        |

PAD

|     |      |         |                                                              |
|-----|------|---------|--------------------------------------------------------------|
|     | Read | 7A48z   | Other bypass of femoral artery or popliteal artery NOS       |
|     | Read | 7A49    | Reconstruction of femoral artery or popliteal artery         |
|     | Read | 7A490   | Endarterectomy and patch repair of femoral artery            |
|     | Read | 7A491   | Endarterectomy and patch repair of popliteal artery          |
|     | Read | 7A492   | Endarterectomy of femoral artery NEC                         |
|     | Read | 7A493   | Endarterectomy of popliteal artery NEC                       |
|     | Read | 7A494   | Profundoplasty femoral artery & patch repair deep fem artery |
|     | Read | 7A495   | Profundoplasty and patch repair of popliteal artery          |
|     | Read | 7A496   | Profundoplasty of femoral artery NEC                         |
|     | Read | 7A497   | Profundoplasty of popliteal artery NEC                       |
|     | Read | 7A498   | Reconstruction of femoral artery with vein graft             |
|     | Read | 7A499   | Reconstruction of popliteal artery with vein graft           |
|     | Read | 7A49y   | Reconstruction of femoral or popliteal artery OS             |
|     | Read | 7A49z   | Reconstruction of femoral or popliteal artery NOS            |
|     | Read | 7A4A    | Other open operations on femoral artery or popliteal artery  |
|     | Read | 7A4A0   | Repair of femoral artery NEC                                 |
|     | Read | 7A4A1   | Repair of popliteal artery NEC                               |
|     | Read | 7A4A2   | Open embolectomy of femoral artery                           |
|     | Read | 7A4A211 | Open thrombectomy of femoral artery                          |
|     | Read | 7A4A212 | Open femoral embolectomy                                     |
|     | Read | 7A4A3   | Open embolectomy popliteal artery                            |
|     | Read | 7A4A311 | Open thrombectomy of popliteal artery                        |
| PAD | Read | 7A4A7   | Repair of femoral artery with temporary silastic shunt       |
|     | Read | 7A4A8   | Repair of popliteal artery with temporary silastic shunt     |
|     | Read | 7A4Ay   | Other open operation on femoral or popliteal artery OS       |
|     | Read | 7A4B0   | Percutaneous transluminal angioplasty of femoral artery      |
|     | Read | 7A4B1   | Percutaneous transluminal angioplasty of popliteal artery    |
|     | Read | 7A4B2   | Percutaneous transluminal embolectomy of femoral artery      |
|     | Read | 7A4B3   | Percutaneous transluminal embolectomy of popliteal artery    |
|     | Read | 7A4B4   | Percutaneous transluminal embolisation of femoral artery     |
|     | Read | 7A4B5   | Percutaneous transluminal embolisation of popliteal artery   |
|     | Read | 7A4B8   | Percut translum thrombolysis femoral graft streptokinase     |
|     | Read | 7A4B9   | Percutaneous transluminal insertion of stent femoral artery  |
|     | Read | 7A50    | Revision of reconstruction of artery                         |
|     | Read | 7A500   | Revision of reconstruction involving aorta                   |
|     | Read | 7A501   | Revision of reconstruction involving iliac artery            |
|     | Read | 7A502   | Revision of reconstruction involving femoral artery          |
|     | Read | 7A503   | Revision of reconstruction of popliteal artery               |
|     | Read | A3A0F   | Gas gangrene-foot                                            |
|     | Read | C107    | Diabetes mellitus with peripheral circulatory disorder       |
|     | Read | C1070   | Diabetes mellitus, juvenile +peripheral circulatory disorder |
|     | Read | C1071   | Diabetes mellitus, adult, + peripheral circulatory disorder  |
|     | Read | C1073   | IDDM with peripheral circulatory disorder                    |
|     | Read | C1074   | NIDDM with peripheral circulatory disorder                   |
|     | Read | C107z   | Diabetes mellitus NOS with peripheral circulatory disorder   |
| PAD | Read | C108G   | Insulin dependent diab mell with peripheral angiopathy       |

|      |         |                                                         |                               |
|------|---------|---------------------------------------------------------|-------------------------------|
| Read | C109F   | Non-insulin-dependent d m with peripheral angiopath     |                               |
| Read | C109F11 | Type II diabetes mellitus with peripheral angiopathy    |                               |
| Read | C109F12 | Type 2 diabetes mellitus with peripheral angiopathy     |                               |
| Read | C10EG   | Type 1 diabetes mellitus with peripheral angiopathy     |                               |
| Read | C10FF   | Type 2 diabetes mellitus with peripheral angiopathy     |                               |
| Read | G700    | Aorto-iliac disease                                     |                               |
| Read | G702    | Extremity artery atheroma                               |                               |
| Read | G702z   | Extremity artery atheroma NOS                           |                               |
| Read | G73     | Other peripheral vascular disease                       |                               |
| Read | G731    | Thromboangiitis obliterans                              |                               |
| Read | G7310   | Buerger's disease                                       |                               |
| Read | G731z   | Thromboangiitis obliterans NOS                          |                               |
| Read | G732    | Peripheral gangrene                                     |                               |
| Read | G7320   | Gangrene of toe                                         |                               |
| Read | G7321   | Gangrene of foot                                        |                               |
| Read | G733    | Ischaemic foot                                          |                               |
| Read | G73y    | Other specified peripheral vascular disease             |                               |
| Read | G73y0   | Diabetic peripheral angiopathy                          |                               |
| Read | G73y1   | Peripheral angiopathic disease EC NOS                   |                               |
| Read | G73y2   | Acrocyanosis                                            |                               |
| Read | G73y4   | Acroparaesthesia - Schultze's type                      |                               |
| Read | G73y5   | Acroparaesthesia - Nothnagel's type                     |                               |
| Read | G73y511 | Nothnagel's vasomotor acroparaesthesia                  |                               |
| Read | G73y6   | Acroparaesthesia - unspecified                          |                               |
| Read | G73y7   | Erythrocyanosis                                         |                               |
| Read | G73y8   | Erythromelalgia                                         |                               |
| Read | G73yz   | Other specified peripheral vascular disease NOS         |                               |
| Read | G73z    | Peripheral vascular disease NOS                         |                               |
| Read | G73z0   | Intermittent claudication                               |                               |
| Read | G73z011 | Claudication                                            |                               |
| Read | G73zz   | Peripheral vascular disease NOS                         |                               |
| Read | G740    | Aortoiliac obstruction                                  |                               |
| Read | G7424   | Embolism and thrombosis of the femoral artery           |                               |
| Read | G7425   | Embolism and thrombosis of the popliteal artery         |                               |
| Read | G7426   | Embolism and thrombosis of the anterior tibial artery   |                               |
| Read | G7427   | Embolism and thrombosis of the dorsalis pedis artery    |                               |
| Read | G7429   | Embolism and thrombosis of a leg artery NOS             |                               |
| Read | G742z   | Peripheral arterial embolism and thrombosis NOS         |                               |
| Read | G74y0   | Embolism and/or thrombosis of the common iliac artery   |                               |
| Read | G74y1   | Embolism and/or thrombosis of the internal iliac artery |                               |
| Read | G74y2   | Embolism and/or thrombosis of the external iliac artery |                               |
| Read | G74y3   | Embolism and thrombosis of the iliac artery unspecified |                               |
| Read | Gyu74   | [X]Other specified peripheral vascular diseases         |                               |
| Read | M271    | Ischaemic leg ulcer                                     |                               |
| PAD  | Read    | M2710                                                   | Ischaemic ulcer diabetic foot |
|      | Read    | M2713                                                   | Arterial leg ulcer            |

|     |        |         |                                                                     |
|-----|--------|---------|---------------------------------------------------------------------|
|     | Read   | M2714   | Mixed venous and arterial leg ulcer                                 |
|     | Read   | R0542   | [D]Gangrene of toe in diabetic                                      |
|     | Read   | R0543   | [D]Widespread diabetic foot gangrene                                |
|     | Read   | R0550   | [D]Failure of peripheral circulation                                |
|     | Read   | R055011 | [D]Peripheral circulatory failure                                   |
|     | ICD-10 | I731    | Thromboangiitis obliterans [Buerger]                                |
|     | ICD-10 | I738    | Other specified peripheral vascular diseases                        |
|     | ICD-10 | I739    | Peripheral vascular disease, unspecified                            |
|     | ICD-10 | I743    | Embolism and thrombosis of arteries of lower extremities            |
|     | ICD-10 | I744    | Embolism and thrombosis of arteries of extremities, unspecified     |
|     | ICD-10 | I745    | Embolism and thrombosis of iliac artery                             |
|     | OPCS-4 | L50     | Other emergency bypass of iliac artery                              |
|     | OPCS-4 | L51     | Other bypass of iliac artery                                        |
|     | OPCS-4 | L52     | Reconstruction of iliac artery                                      |
|     | OPCS-4 | L530    | Other open operations on iliac artery                               |
|     | OPCS-4 | L531    | Repair of iliac artery NEC                                          |
|     | OPCS-4 | L532    | Open embolectomy of iliac artery                                    |
|     | OPCS-4 | L541    | Percutaneous transluminal angioplasty of iliac artery               |
|     | OPCS-4 | L542    | Percutaneous transluminal embolectomy of iliac artery               |
|     | OPCS-4 | L544    | Percutaneous transluminal insertion of stent into iliac artery      |
|     | OPCS-4 | L548    | Other specified transluminal operations on iliac artery             |
|     | OPCS-4 | L549    | Unspecified transluminal operations on iliac artery                 |
|     | OPCS-4 | L58     | Other emergency bypass of femoral artery                            |
|     | OPCS-4 | L59     | Other bypass of femoral artery                                      |
|     | OPCS-4 | L60     | Reconstruction of femoral artery                                    |
|     | OPCS-4 | L620    | Other open operations on femoral artery                             |
|     | OPCS-4 | L621    | Repair of femoral artery NEC                                        |
|     | OPCS-4 | L622    | Open embolectomy of femoral artery                                  |
|     | OPCS-4 | L628    | Other specified other open operations on femoral artery             |
|     | OPCS-4 | L629    | Unspecified other open operations on femoral artery                 |
|     | OPCS-4 | L631    | Percutaneous transluminal angioplasty of femoral artery             |
|     | OPCS-4 | L632    | Percutaneous transluminal embolectomy of femoral artery             |
|     | OPCS-4 | L633    | Percutaneous transluminal embolisation of femoral artery            |
|     | OPCS-4 | L635    | Percutaneous transluminal insertion of stent into femoral artery    |
|     | OPCS-4 | L650    | Revision of reconstruction of artery                                |
|     | OPCS-4 | L651    | Revision of reconstruction involving aorta                          |
|     | OPCS-4 | L652    | Revision of reconstruction involving iliac artery                   |
|     | OPCS-4 | L653    | Revision of reconstruction involving femoral artery                 |
| CAD | ICD-10 | I20     | Angina pectoris                                                     |
|     | ICD-10 | I21     | Acute myocardial infarction                                         |
|     | ICD-10 | I22     | Subsequent myocardial infarction                                    |
|     | ICD-10 | I23     | Certain current complications following acute myocardial infarction |
|     | ICD-10 | I24     | Other acute ischaemic heart diseases                                |
|     | ICD-10 | I25     | Chronic ischaemic heart disease                                     |
| CAD | Read   | 14AL    | H/O: Treatment for ischaemic heart disease                          |
|     | Read   | G310    | Dressler's syndrome                                                 |
|     | Read   | G33z5   | Post infarct angina                                                 |
|     | Read   | 889A    | Diab mellit insulin-glucose infus acute myocardial infarct          |



|  |      |         |                                                      |
|--|------|---------|------------------------------------------------------|
|  | Read | 6A2     | Coronary heart disease annual review                 |
|  | Read | 6A4     | Coronary heart disease review                        |
|  | Read | 8B3k    | Coronary heart disease medication review             |
|  | Read | 8H2V    | Admit ischaemic heart disease emergency              |
|  | Read | G3      | Ischaemic heart disease                              |
|  | Read | G31     | Other acute and subacute ischaemic heart disease     |
|  | Read | G3110   | Myocardial infarction aborted                        |
|  | Read | G311011 | MI - myocardial infarction aborted                   |
|  | Read | G31y    | Other acute and subacute ischaemic heart disease     |
|  | Read | G31y2   | Subendocardial ischaemia                             |
|  | Read | G31y3   | Transient myocardial ischaemia                       |
|  | Read | G31yz   | Other acute and subacute ischaemic heart disease NOS |
|  | Read | G34     | Other chronic ischaemic heart disease                |
|  | Read | G340    | Coronary atherosclerosis                             |
|  | Read | G344    | Silent myocardial ischaemia                          |
|  | Read | G34y    | Other specified chronic ischaemic heart disease      |
|  | Read | G34y1   | Chronic myocardial ischaemia                         |
|  | Read | G34yz   | Other specified chronic ischaemic heart disease NOS  |
|  | Read | G34z    | Other chronic ischaemic heart disease NOS            |
|  | Read | G34z0   | Asymptomatic coronary heart disease                  |
|  | Read | G3y     | Other specified ischaemic heart disease              |
|  | Read | G3z     | Ischaemic heart disease NOS                          |
|  | Read | Gyu3    | [X]Ischaemic heart diseases                          |
|  | Read | Gyu32   | [X]Other forms of acute ischaemic heart disease      |
|  | Read | Gyu33   | [X]Other forms of chronic ischaemic heart disease    |
|  | Read | G300    | Acute anterolateral infarction                       |
|  | Read | G301    | Other specified anterior MI                          |
|  | Read | G3010   | Acute anteroapical infarction                        |
|  | Read | G3011   | Acute anteroseptal infarction                        |
|  | Read | G301z   | Anterior MI NOS                                      |
|  | Read | G302    | Acute inferolateral infarction                       |
|  | Read | G303    | Acute inferoposterior infarction                     |
|  | Read | G304    | Posterior MI NOS                                     |
|  | Read | G305    | Lateral MI NOS                                       |
|  | Read | G306    | True posterior MI                                    |
|  | Read | G307    | Acute subendocardial infarction                      |
|  | Read | G3070   | Acute non-Q wave infarction                          |
|  | Read | G3071   | Acute non-ST segment elevation MI                    |
|  | Read | G308    | Inferior MI NOS                                      |
|  | Read | G309    | Acute Q-wave infarct                                 |
|  | Read | G30A    | Mural thrombosis                                     |
|  | Read | G30B    | Acute posterolateral MI                              |
|  | Read | G30X    | Acute transmural MI of unspecif site                 |
|  | Read | G30X0   | Acute ST segment elevation MI                        |
|  | Read | G30y    | Other acute MI                                       |
|  | Read | G30z    | Acute MI NOS                                         |

CAD

|      |         |                                |
|------|---------|--------------------------------|
| Read | G311    | Unstable angina                |
| Read | G3112   | Angina at rest                 |
| Read | G3113   | Refractory angina              |
| Read | G3114   | Worsening angina               |
| Read | G3115   | Acute coronary syndrome        |
| Read | G31y0   | Acute coronary syndrome        |
| Read | G33     | Angina pectoris                |
| Read | G33z    | Angina pectoris NOS            |
| Read | G33z3   | Angina on effort               |
| Read | G33z4   | Ischaemic chest pain           |
| Read | G33zz   | Angina pectoris NOS            |
| Read | G3400   | Single coronary vessel disease |
| Read | G3401   | Double coronary vessel disease |
| Read | G70y011 | Carotid artery disease         |
| Read | G30     | Acute MI                       |
| Read | G32     | Old MI                         |
| Read | G32     | Old MI                         |

ICD-10, International Classification of Disease, 10th Version; BNF, British National Formulary; PAD, peripheral arterial disease; CAD, coronary artery disease; HF, heart failure; ACEi, angiotensin-converting-enzyme inhibitor (ACEi); ARB, angiotensin II receptor blocker (ARB); LD, loop diuretic; MRA, mineralocorticoid receptor antagonists.

**Table S3:** ICD-10 and Greater Glasgow and Clyde NHS formatted Read Codes used to identify patients with heart failure.

| Code Type | Code  | Description                                                                                 | Conrad et al | Included |
|-----------|-------|---------------------------------------------------------------------------------------------|--------------|----------|
| ICD-10    | I50   | Heart Failure                                                                               | 1            | 1        |
| ICD-10    | I420  | Dilated cardiomyopathy (congestive cardiomyopathy                                           | 1            | 1        |
|           |       | Cardiomyopathy, unspecified (Cardiomyopathy                                                 |              |          |
| ICD-10    | I429  | (primary)(secondary) NOS)                                                                   | 1            | 1        |
| ICD-10    | I110  | Hypertensive heart disease with (congestive) heart failure                                  | 1            | 1        |
| ICD-10    | I255  | Ischaemic cardiomyopathy                                                                    | 1            | 1        |
| ICD-10    | I132  | Hypertensive heart and renal disease with both (congestive) heart failure and renal failure | 1            | 1        |
| ICD-10    | I130  | Hypertensive heart and renal disease with (congestive) heart failure                        | 1            | 1        |
| Read      | 585f  | Echocardiogram shows left ventricular systolic dysfunction                                  | 1            | 1        |
| Read      | G58   | Heart Failure                                                                               | 1            | 1        |
| Read      | G581  | Left ventricular failure                                                                    | 1            | 1        |
| Read      | 662g  | NYHA classification class II                                                                | 1            | 1        |
| Read      | 662f  | NYHA classification - class I                                                               | 1            | 1        |
| Read      | G5yy9 | Left ventricular systolic dysfunction                                                       | 1            | 1        |
| Read      | G580  | Congestive heart failure                                                                    | 1            | 1        |
| Read      | 662h  | NYHA classification- class III                                                              | 1            | 1        |
| Read      | 9hH1  | Excepted heart failure quality indicators: informed dissent                                 | 1            | 1        |
| Read      | 9hH0  | Excepted heart failure quality indicators: patient unsuitable                               | 1            | 1        |
| Read      | 21264 | Heart Failure resolved                                                                      | 1            | 1        |
| Read      | G5802 | Decompensated cardiac failure                                                               | 1            | 1        |
| Read      | G58z  | Heart failure NOS                                                                           | 1            | 1        |
| Read      | 662i  | NYHA classification - class IV                                                              | 1            | 1        |
| Read      | G5801 | Chronic congestive heart failure                                                            | 1            | 1        |
| Read      | 8HHb  | Referral to heart failure nurse                                                             | 1            | 1        |
| Read      | G5810 | Acute left ventricular failure                                                              | 1            | 1        |
| Read      | G343  | Ischaemic cardiomyopathy                                                                    | 1            | 1        |
| Read      | G582  | Acute heart failure                                                                         | 1            | 1        |
| Read      | G5800 | Acute congestive heart failure                                                              | 0            | 1        |
| Read      | G583  | Heart failure with normal ejection fraction                                                 | 1            | 1        |
| Read      | 585g  | Echocardiogram shows left ventricular diastolic dysfunction                                 | 1            | 1        |
| Read      | G584  | Right ventricular failure                                                                   | 1            | 1        |
| Read      | G5yyA | Left ventricular diastolic dysfunction                                                      | 1            | 1        |
| Read      | G5544 | Primary dilated cardiomyopathy                                                              | 1            | 1        |
| Read      | G55z  | Cardiomyopathy NOS                                                                          | 1            | 1        |
| Read      | G5803 | Compensated cardiac failure                                                                 | 1            | 1        |
| Read      | G5804 | Congestive heart failure due to valvular disease                                            | 1            | 1        |
| Read      | G555  | Alcoholic cardiomyopathy                                                                    | 1            | 1        |
| Read      | G551  | Hypertrophic obstructive cardiomyopathy                                                     | 1            | 1        |
| Read      | G5yyD | Left ventricular cardiac dysfunction                                                        | 1            | 1        |
| Read      | 9hH   | Exception reporting heart failure quality indicators                                        | 1            | 1        |
| Read      | G1yz1 | Pneumatic left ventricular failure                                                          | 1            | 1        |
| Read      | 679X  | Heart failure education                                                                     | 1            | 1        |

|      |       |                                                                      |   |   |
|------|-------|----------------------------------------------------------------------|---|---|
| Read | 8HBE  | Heart failure follow-up                                              | 1 | 1 |
| Read | 1O1   | Heart failure confirmed                                              | 1 | 1 |
| Read | 8H2S  | Admit heart failure emergency                                        | 1 | 1 |
| Read | 8CMK  | Has heart failure management plan                                    | 1 | 1 |
| Read | 9Or5  | Heart failure monitoring third letter                                | 1 | 1 |
| Read | 9Or3  | Heart failure monitoring first letter                                | 1 | 1 |
| Read | 9Or4  | Heart failure monitoring second letter                               | 1 | 1 |
| Read | 9Or2  | Heart failure monitoring verbal invite                               | 1 | 1 |
| Read | 9Or   | Heart failure monitoring administration                              | 1 | 1 |
| Read | 9Or1  | Heart failure monitoring telephone invite                            | 1 | 1 |
| Read | 8HgD  | Discharge from heart failure nurse service                           | 1 | 1 |
| Read | 8HHz  | Referral to heart failure exercise programme                         | 1 | 1 |
| Read | 8CL3  | Heart failure care plan discussed with patient                       | 1 | 1 |
| Read | 8IE1  | Referral to heart failure exercise program declined                  | 1 | 1 |
| Read | 8IB8  | Referral to heart failure exercise program not indicated             | 1 | 1 |
| Read | 8CeC  | Preferred place of care for next exacerbation heart failure          | 1 | 1 |
| Read | G55   | Cardiomyopathy                                                       | 1 | 1 |
| Read | G5540 | Congestive Cardiomyopathy                                            | 1 | 1 |
| Read | G559  | Arrhythmogenic right ventricular cardiomyopathy                      | 1 | 1 |
| Read | 33BA  | Impaired left ventricular function                                   | 1 | 1 |
| Read | G41z  | Chronic cor pulmonale                                                | 1 | 1 |
| Read | G5543 | Hypertrophic non-obstructive cardiomyopathy                          | 1 | 1 |
| Read | G55y  | Secondary cardiomyopathy NOS                                         | 1 | 1 |
| Read | G5542 | Familial cardiomyopathy                                              | 1 | 1 |
| Read | 8CMW8 | Heart failure clinical pathway                                       | 1 | 1 |
| Read | G5581 | Cardiomyopathy in myotonic dystrophy                                 | 1 | 1 |
| Read | Gyu5M | [X] Other hypertrophic cardiomyopathy                                | 1 | 1 |
| Read | G2111 | Benign hypertensive heart disease with CCF                           | 1 | 1 |
| Read | G21z1 | Hypertensive heart disease NOS with CCF                              | 1 | 1 |
| Read | G232  | hypertensive heart and renal disease with (congestive) heart failure | 1 | 1 |
| Read | 662T  | Congestive heart failure monitoring                                  | 1 | 1 |
| Read | 662W  | Heart failure annual review                                          | 1 | 1 |
| Read | 662p  | Heart failure 6 month review                                         | 1 | 1 |
| Read | 9On   | Left ventricular dysfunction monitoring administration               | 1 | 1 |
| Read | 9On0  | Left ventricular dysfunction monitoring 1st letter                   | 1 | 1 |
| Read | 9On1  | Left ventricular dysfunction monitoring 2nd letter                   | 1 | 1 |
| Read | 9On2  | Left ventricular dysfunction monitoring 3rd letter                   | 1 | 1 |
| Read | 9On3  | Left ventricular dysfunction monitoring verbal invite                | 1 | 1 |
| Read | 9On4  | Left ventricular dysfunction monitoring telephone invite             | 1 | 1 |
| Read | 9N4s  | Did not attend practice nurse heart failure clinic                   | 1 | 1 |
| Read | 8B29  | Cardiac failure therapy                                              | 1 | 1 |
| Read | 23E1  | O/E -pulmonary oedema                                                | 1 | 1 |
| Read | 9h1   | Exception reporting: LVD quality indicators                          | 1 | 1 |
| Read | 9h12  | Excepted from LVD quality indicators: informed dissent               | 1 | 1 |
| Read | 9h11  | Excepted from LVD quality indicators: Patient unsuitable             | 1 | 1 |

|      |       |                                                                   |   |   |
|------|-------|-------------------------------------------------------------------|---|---|
| Read | 14A6  | H/O: heart failure                                                | 1 | 1 |
| Read | 14AM  | H/O: heart failure in last year                                   | 1 | 1 |
| Read | 8HTL0 | Referral to rapid access heart failure clinic                     | 1 | 1 |
| Read | 8IE0  | Referral to heart failure education group declined                | 1 | 1 |
| Read | G234  | Hyperten heart & renal dis + both (congestv) heart and renal fail | 0 | 1 |
| Read | 12CR  | HF: Hypertrophic obstructive cardiomyopathy                       | 1 | 1 |

**Table S4:** Greater Glasgow and Clyde formatted Read Codes used to exclude heart failure cases where the code refers to an existing diagnosis after 31<sup>st</sup> December 2012.

| Code    | Description                                                   | Conrad et al | Included |
|---------|---------------------------------------------------------------|--------------|----------|
| 9N4s    | Did not attend practice nurse heart failure clinic            | 1            | 1        |
| 8B29    | Cardiac failure therapy                                       | 1            | 1        |
| 679X    | Heart failure education                                       | 1            | 1        |
| 8HHb    | Referral to heart failure nurse                               | 1            | 1        |
| 23E1    | O/E – pulmonary oedema                                        | 1            | 1        |
| 9hH     | Exception reporting: heart failure quality indicators         | 1            | 1        |
| 9hH0    | Excepted heart failure quality indicators: Patient unsuitable | 1            | 1        |
| 9h1     | Exception reporting: LVD quality indicators                   | 1            | 1        |
| 9h11    | Exception from LVD quality indicators: Patient unsuitable     | 1            | 1        |
| 9h12    | Exception from LVD quality indicators: Informed dissent       | 1            | 1        |
| 14A6    | H/O: heart failure                                            | 1            | 1        |
| 14AM    | H/O: Heart failure in last year                               | 1            | 1        |
| 662p    | Heart failure 6 month review                                  | 1            | 1        |
| 662T    | Congestive heart failure monitoring                           | 1            | 1        |
| 662W    | Heart failure annual review                                   | 1            | 1        |
| 8CL3    | Heart failure care plan discussed with patient                | 1            | 1        |
| 8HBE    | Heart failure follow-up                                       | 1            | 1        |
| 8HHz    | Referral to heart failure exercise programme                  | 1            | 1        |
| 8Hk0    | Referred to heart failure education group                     | 1            | 1        |
| 9hH1    | Excepted heart failure quality indicators: Informed dissent   | 1            | 1        |
| 9Or     | Heart failure monitoring administration                       | 1            | 1        |
| 9Or0    | Heart failure review completed                                | 1            | 1        |
| 9Or1    | Heart failure monitoring telephone invite                     | 1            | 1        |
| 9Or2    | Heart failure monitoring verbal invite                        | 1            | 1        |
| 9Or3    | Heart failure monitoring first letter                         | 1            | 1        |
| 9Or4    | Heart failure monitoring second letter                        | 1            | 1        |
| 9Or5    | Heart failure monitoring third letter                         | 1            | 1        |
| 9On     | Left ventricular dysfunction monitoring administration        | 1            | 1        |
| 9On0    | Left ventricular dysfunction monitoring first letter          | 1            | 1        |
| 9On1    | Left ventricular dysfunction monitoring second letter         | 1            | 1        |
| 9On2    | Left ventricular dysfunction monitoring third letter          | 1            | 1        |
| 9On3    | Left ventricular dysfunction monitoring verbal invite         | 1            | 1        |
| 9On4    | Left ventricular dysfunction monitoring telephone invite      | 1            | 1        |
| 2126400 | Heart Failure Resolved                                        | 1            | 1        |
| 21264   | Heart Failure Resolved                                        | 1            | 1        |
| 8HgD    | Discharged from heart failure nurse service                   | 1            | 1        |
| 8HTL000 | Referral to rapid access heart failure clinic                 | 1            | 1        |
| 8HTL0   | Referral to rapid access heart failure clinic                 | 1            | 1        |
| 8IB8    | Referral to heart failure exercise programme not indicated    | 1            | 1        |
| 8IE1    | Referral to heart failure excursive programme declined        | 1            | 1        |
| 81E0    | Referral to heart failure education group declined            | 1            | 1        |
| 12CR    | FH: Hypertrophic obstructive cardiomyopathy                   | 1            | 1        |

**Table S5:** Prescribed medication classifications, categories each medication was assigned to, the portion of the BNF code used to select for said category, and the description of the BNF selection code.

| Category                                                                                                                                                                                                          | BNF selection code     | Description                                           |
|-------------------------------------------------------------------------------------------------------------------------------------------------------------------------------------------------------------------|------------------------|-------------------------------------------------------|
| ACEi                                                                                                                                                                                                              | 0205051                | Angiotensin converting enzyme                         |
| Antiplatelet                                                                                                                                                                                                      | 0209                   | Antiplatelet                                          |
| ARB                                                                                                                                                                                                               | 0205052<br>0206020Z0   | Angiotensin receptor blockers<br>Valsartan/Amlodipine |
| Beta-blocker                                                                                                                                                                                                      | 0204                   | Beta-adrenergic blocking agents                       |
| Bronchodilators                                                                                                                                                                                                   | 0301                   | Bronchodilators                                       |
| B12                                                                                                                                                                                                               | 0901020D0<br>0901020N0 | Cyanocobalamin<br>Hydroxocobalamin                    |
| Calcium-channel blockers                                                                                                                                                                                          | 020602                 | Calcium-channel blockers                              |
|                                                                                                                                                                                                                   | 0205052AB              | Olmesartan medoxomil/amlodipine                       |
|                                                                                                                                                                                                                   | 0205052AC              | Olmesartan medoxomil/amlodipine/hydrochlorothiazide   |
|                                                                                                                                                                                                                   | 0206020C0<br>0206020T0 | Diltiazem hydrochloride<br>Verapamil hydrochloride    |
| Digoxin                                                                                                                                                                                                           | 0201010F               | Digoxin                                               |
| Hypoglycemics                                                                                                                                                                                                     | 060101                 | Insulin                                               |
|                                                                                                                                                                                                                   | 060102                 | Other hypoglycaemics                                  |
| Folate                                                                                                                                                                                                            | 0901020G0              | Folic Acid                                            |
| Lipid-regulating                                                                                                                                                                                                  | 0212                   | Lipid-regulating                                      |
| Loop diuretics                                                                                                                                                                                                    | 020202                 | Loop diuretics                                        |
|                                                                                                                                                                                                                   | 0202040D0              | Amiloride HCl with loop diuretics                     |
|                                                                                                                                                                                                                   | 0202040B0              | Co-amilofruse (Amiloride hydrochloride/furosemide)    |
|                                                                                                                                                                                                                   | 0202040T0              | Spirolactone with loop diuretics                      |
|                                                                                                                                                                                                                   | 0202040U0              | Triamterene with loop diuretics                       |
|                                                                                                                                                                                                                   | 0202080D0              | Bumetanide/Amiloride hydrochloride                    |
|                                                                                                                                                                                                                   | 0202080C0              | Bumetanide/potassium                                  |
|                                                                                                                                                                                                                   | 0202080K0              | Furosemide/potassium                                  |
| Low dose aspirin                                                                                                                                                                                                  | 0202000A0              | Aspirin                                               |
|                                                                                                                                                                                                                   | 0204000AC              | Bisoprolol fumarate/aspirin                           |
|                                                                                                                                                                                                                   | 0209000V0              | Dipyridamole and Aspirin                              |
| MRA                                                                                                                                                                                                               | 0202030X0              | Eplerenone                                            |
|                                                                                                                                                                                                                   | 0202030S0              | Spirolactone                                          |
|                                                                                                                                                                                                                   | 0202040G0              | Co-flumactone(Hydroflumethiazide/spirolactone)        |
|                                                                                                                                                                                                                   | 0202040T0              | Spirolactone with loop diuretics                      |
|                                                                                                                                                                                                                   | 0202040S0              | Spirolactone with thiazides                           |
| NSAIDs                                                                                                                                                                                                            | 100101                 | NSAIDs                                                |
| Oral anticoagulants                                                                                                                                                                                               | 020802                 | Oral anticoagulants                                   |
| Oral Iron                                                                                                                                                                                                         | 0901011C0              | Compound iron prescriptions                           |
|                                                                                                                                                                                                                   | 0901011Y0              | Ferric maltol                                         |
|                                                                                                                                                                                                                   | 0901011X0              | Ferrous calcium citrate                               |
|                                                                                                                                                                                                                   | 0901011F0              | Ferrous fumarate                                      |
|                                                                                                                                                                                                                   | 0901011H0              | Ferrous gluconate                                     |
|                                                                                                                                                                                                                   | 0901011K0              | Ferrous glycine sulphate                              |
|                                                                                                                                                                                                                   | 0901011P0              | Ferrous sulphate                                      |
| PPI                                                                                                                                                                                                               | 010305                 | Proton pump inhibitors                                |
| H2 antagonists                                                                                                                                                                                                    | 010301                 | H2-Receptro Antagonists                               |
| BNF, British National Formulary; ACEi, Angiotensin-converting enzyme inhibitors; ARB, Angiotensin II receptor blocker; MRA, Mineralocorticoid receptor antagonists; NSAIDs, non-steroidal anti inflammatory drugs |                        |                                                       |

| <b>Table S6: Characteristics of those without heart failure – Survivors at 31/12/2014<br/>(all data listed on or before 31/12/2014 unless stated otherwise)</b> |                   |                  |                   |                      |                    |                   |                   |                    |
|-----------------------------------------------------------------------------------------------------------------------------------------------------------------|-------------------|------------------|-------------------|----------------------|--------------------|-------------------|-------------------|--------------------|
| WHO anaemia Class (Nadir 2013 to 2014)                                                                                                                          | No Hb measured    | >4 above         | 3-4 above         | 1-3 above            | 0-1 above          | 0-1 below         | 1-2 below         | >2 below           |
| N=                                                                                                                                                              | 40,740<br>(24%)   | 1,374<br>(1%)    | 6,325<br>(4%)     | 55,166<br>(32%)      | 34,025<br>(20%)    | 17,462<br>(10%)   | 9,308<br>(5%)     | 8,540<br>(5%)      |
| Age (years) in 2013                                                                                                                                             | 62<br>(56-70)     | 62<br>(55-69)    | 62<br>(56-69)     | 64<br>(57-72)        | 67<br>(59-76)      | 71<br>(62-79)     | 73<br>(64-80)     | 73<br>(65-81)      |
| Sex (women)                                                                                                                                                     | 20,606<br>(51%)   | 448<br>(33%)     | 2,498<br>(39%)    | 29,812<br>(54%)      | 20,848<br>(61%)    | 10,927<br>(63%)   | 5,592<br>(60%)    | 4,549<br>(53%)     |
| Diabetes or Hypoglycaemic Therapy                                                                                                                               | 4,671<br>(11%)    | 239<br>(17%)     | 1,090<br>(17%)    | 9,847 (18%)          | 7,019<br>(21%)     | 4,313<br>(25%)    | 2,569<br>(28%)    | 2,411<br>(28%)     |
| IHD                                                                                                                                                             | 4,741<br>(12%)    | 230<br>(17%)     | 1,108<br>(18%)    | 11,232<br>(20%)      | 8,589<br>(25%)     | 4,973<br>(28%)    | 2,861<br>(31%)    | 2,692<br>(32%)     |
| COPD                                                                                                                                                            | 2,430<br>(6%)     | 214<br>(16%)     | 818<br>(13%)      | 6,524 (12%)          | 4,729<br>(14%)     | 2,927<br>(17%)    | 1,767<br>(19%)    | 1,765<br>(21%)     |
| eGFR (last available)                                                                                                                                           | 82<br>(72-93)     | 82<br>(71-94)    | 82<br>(72-93)     | 81<br>(70-92)        | 78<br>(67-90)      | 74<br>(62-87)     | 72<br>(57-87)     | 73<br>(58-88)      |
| GI disease                                                                                                                                                      | 679 (2%)          | 38 (3%)          | 158 (2%)          | 1,609 (3%)           | 1,370 (4%)         | 923 (5%)          | 700 (8%)          | 1,071<br>(13%)     |
| Any cancer prior to 2013                                                                                                                                        | 1,472<br>(4%)     | 58 (4%)          | 246 (4%)          | 2,960 (5%)           | 2,377 (7%)         | 1,555<br>(9%)     | 1,011<br>(11%)    | 1,101<br>(13%)     |
| Any incident cancer 2013/14                                                                                                                                     | 49 (0%)           | 11 (1%)          | 44 (1%)           | 577 (1%)             | 630 (2%)           | 618 (4%)          | 537 (6%)          | 910 (11%)          |
| <b>ECG (last result prior to 1<sup>st</sup> January 2015)</b>                                                                                                   |                   |                  |                   |                      |                    |                   |                   |                    |
| AF/Flutter                                                                                                                                                      | 222/3,271<br>(7%) | 45/361<br>(12%)  | 138/1,536<br>(9%) | 1,118/15,526<br>(7%) | 887/11,776<br>(8%) | 604/7,276<br>(8%) | 410/4,413<br>(9%) | 466/4,863<br>(10%) |
| <b>Haemoglobin prior to 1<sup>st</sup> January 2013</b>                                                                                                         |                   |                  |                   |                      |                    |                   |                   |                    |
| Hb 4g/dL above WHO                                                                                                                                              | 296 (1%)          | 271<br>(26%)     | 266 (5%)          | 197 (0%)             | 35 (0%)            | 18 (0%)           | <6 (NA%)          | 13 (0%)            |
| Hb 3-4g/dL above WHO                                                                                                                                            | 1,439<br>(6%)     | 360<br>(35%)     | 1,401<br>(29%)    | 1,813 (4%)           | 162 (1%)           | 96 (1%)           | 30 (0%)           | 31 (0%)            |
| Hb 1-3g/dL above WHO                                                                                                                                            | 12,165<br>(52%)   | 324<br>(31%)     | 2,794<br>(57%)    | 29,661<br>(65%)      | 7,586<br>(25%)     | 1,866<br>(12%)    | 810 (9%)          | 718 (9%)           |
| Hb 0-1g/dL above WHO                                                                                                                                            | 5,835<br>(25%)    | 28 (3%)          | 250 (5%)          | 10,049<br>(22%)      | 13,954<br>(47%)    | 4,799<br>(30%)    | 1,537<br>(18%)    | 1,168<br>(15%)     |
| Anaemia prior to 2013 (% of those tested)                                                                                                                       | 3,726<br>(16%)    | 53 (5%)          | 203 (4%)          | 4,243 (9%)           | 8,265<br>(28%)     | 9,226<br>(58%)    | 6,238<br>(72%)    | 5,850<br>(75%)     |
| <b>Haematinic profile (Between 2013 and 2014)</b>                                                                                                               |                   |                  |                   |                      |                    |                   |                   |                    |
| Ferritin (median (Q1-Q3))                                                                                                                                       | 107<br>(62-197)   | 158<br>(86-291)  | 128<br>(75-217)   | 96<br>(52-171)       | 74<br>(38-141)     | 61<br>(26-133)    | 47<br>(18-123)    | 35<br>(12-120)     |
| Iron (median (Q1-Q3))                                                                                                                                           | 16<br>(12-20)     | 18<br>(15-23)    | 19<br>(14-24)     | 16<br>(12-20)        | 14<br>(10-18)      | 11<br>(8-16)      | 9<br>(6-13)       | 7<br>(4-12)        |
| Transferrin (median (Q1-Q3))                                                                                                                                    | 2.4<br>(2.1-2.7)  | 2.3<br>(2.1-2.6) | 2.5<br>(2.1-2.7)  | 2.4<br>(2.2-2.7)     | 2.4<br>(2.0-2.7)   | 2.3<br>(2.0-2.7)  | 2.3<br>(2.0-2.8)  | 2.3<br>(1.8-2.8)   |
| TSAT (median (Q1-Q3))                                                                                                                                           | 28<br>(22-34)     | 29<br>(26-37)    | 30<br>(22-38)     | 26<br>(20-33)        | 22<br>(15-31)      | 19<br>(12-27)     | 16<br>(10-22)     | 12<br>(6-21)       |
| B12 (median (Q1-Q3))                                                                                                                                            | 313<br>(234-433)  | 335<br>(249-446) | 350<br>(265-464)  | 344<br>(259-456)     | 336<br>(252-461)   | 328<br>(244-447)  | 320<br>(238-438)  | 316<br>(230-449)   |
| Folate (median (Q1-Q3))                                                                                                                                         | 5.7<br>(4.0-7.8)  | 3.9<br>(2.7-6.0) | 4.4<br>(3.1-6.7)  | 4.9<br>(3.3-7.4)     | 5.0<br>(3.5-7.8)   | 4.9<br>(3.3-7.4)  | 4.7<br>(3.2-7.5)  | 4.4<br>(2.9-7.0)   |



|                                                       |                  |                  |                  |                  |                  |                  |                  |                  |
|-------------------------------------------------------|------------------|------------------|------------------|------------------|------------------|------------------|------------------|------------------|
| Serum sodium                                          | 139<br>(137-140) | 138<br>(137-140) | 138<br>(137-140) | 138<br>(137-140) | 138<br>(136-139) | 137<br>(134-139) | 136<br>(133-138) | 135<br>(132-137) |
| Albumin                                               | 38<br>(36-40)    | 38<br>(36-40)    | 38<br>(36-40)    | 37<br>(36-39)    | 36<br>(34-38)    | 35<br>(33-37)    | 34<br>(31-36)    | 31<br>(27-35)    |
| <b>Prescriptions (on 1<sup>st</sup> January 2015)</b> |                  |                  |                  |                  |                  |                  |                  |                  |
| Iron (oral)                                           | 149 (0%)         | <6<br>(NA%)      | 26 (0%)          | 493 (1%)         | 887 (3%)         | 1,314<br>(8%)    | 1,717<br>(18%)   | 2,901<br>(34%)   |
| B12                                                   | 259 (1%)         | 18 (1%)          | 72 (1%)          | 941 (2%)         | 1,054 (3%)       | 825 (5%)         | 632 (7%)         | 704 (8%)         |
| Folate                                                | 272 (1%)         | 59 (4%)          | 189 (3%)         | 1,807 (3%)       | 1,889 (6%)       | 1,663<br>(10%)   | 1,370<br>(15%)   | 1,690<br>(20%)   |
| Loop diuretics                                        | 1,632<br>(4%)    | 87 (6%)          | 382 (6%)         | 4,197 (8%)       | 3,843<br>(11%)   | 2,593<br>(15%)   | 1,775<br>(19%)   | 1,911<br>(22%)   |
| ACEi/ARB                                              | 18,629<br>(46%)  | 681<br>(50%)     | 3,285<br>(52%)   | 28,782<br>(52%)  | 18,284<br>(54%)  | 9,578<br>(55%)   | 5,076<br>(55%)   | 4,242<br>(50%)   |
| BB                                                    | 11,367<br>(28%)  | 412<br>(30%)     | 1,991<br>(31%)   | 18,206<br>(33%)  | 12,061<br>(35%)  | 6,092<br>(35%)   | 3,265<br>(35%)   | 2,962<br>(35%)   |
| MRA                                                   | 115 (0%)         | 14 (1%)          | 35 (1%)          | 337 (1%)         | 311 (1%)         | 188 (1%)         | 142 (2%)         | 248 (3%)         |
| Antiplatelets                                         | 8,303<br>(20%)   | 417<br>(30%)     | 1,907<br>(30%)   | 18,245<br>(33%)  | 13,503<br>(40%)  | 7,892<br>(45%)   | 4,439<br>(48%)   | 3,986<br>(47%)   |
| OAC                                                   | 890 (2%)         | 95 (7%)          | 312 (5%)         | 2,813 (5%)       | 2,043 (6%)       | 1,210<br>(7%)    | 751 (8%)         | 746 (9%)         |
| NSAID                                                 | 4,889<br>(12%)   | 182<br>(13%)     | 863<br>(14%)     | 8,641 (16%)      | 5,647<br>(17%)   | 2,793<br>(16%)   | 1,436<br>(15%)   | 1,140<br>(13%)   |
| Insulin                                               | 559 (1%)         | 14 (1%)          | 86 (1%)          | 942 (2%)         | 874 (3%)         | 666 (4%)         | 422 (5%)         | 394 (5%)         |
| Other hypoglycaemics                                  | 2,985<br>(7%)    | 148<br>(11%)     | 685<br>(11%)     | 6,491 (12%)      | 4,897<br>(14%)   | 3,217<br>(18%)   | 1,914<br>(21%)   | 1,746<br>(20%)   |
| PPI/H2 antagonists                                    | 12,745<br>(31%)  | 540<br>(39%)     | 2,769<br>(44%)   | 27,565<br>(50%)  | 19,986<br>(59%)  | 11,350<br>(65%)  | 6,565<br>(71%)   | 6,472<br>(76%)   |
| <b>Deaths 2015-2018</b>                               |                  |                  |                  |                  |                  |                  |                  |                  |
| All                                                   | 2,340<br>(6%)    | 134<br>(10%)     | 454 (7%)         | 3,631 (7%)       | 3,648<br>(11%)   | 2,940<br>(17%)   | 2,286<br>(25%)   | 2,827<br>(33%)   |
| Age at death                                          | 79<br>(70-87)    | 74<br>(66-81)    | 75<br>(67-83)    | 78<br>(70-86)    | 82<br>(74-88)    | 83<br>(76-89)    | 83<br>(76-89)    | 82<br>(74-88)    |
| Cancer                                                | 702 (30%)        | 32 (24%)         | 136<br>(30%)     | 1,126 (31%)      | 991 (27%)        | 751 (26%)        | 598 (26%)        | 977 (35%)        |
| GI cancer                                             | 195 (8%)         | 7 (5%)           | 36 (8%)          | 266 (7%)         | 253 (7%)         | 176 (6%)         | 132 (6%)         | 302 (11%)        |
| CVD                                                   | 692 (30%)        | 41 (31%)         | 122<br>(27%)     | 1,022 (28%)      | 1,016<br>(28%)   | 780 (27%)        | 598 (26%)        | 613 (22%)        |
| Neuro                                                 | 288 (12%)        | 8 (6%)           | 31 (7%)          | 448 (12%)        | 575 (16%)        | 515 (18%)        | 368 (16%)        | 355 (13%)        |
| Chronic Resp                                          | 182 (8%)         | 26 (19%)         | 77 (17%)         | 408 (11%)        | 408 (11%)        | 315 (11%)        | 250 (11%)        | 277 (10%)        |
| Infection                                             | 197 (8%)         | 15 (11%)         | 38 (8%)          | 272 (7%)         | 289 (8%)         | 272 (9%)         | 214 (9%)         | 282 (10%)        |
| Other                                                 | 279 (12%)        | 12 (9%)          | 50 (11%)         | 355 (10%)        | 369 (10%)        | 307 (10%)        | 258 (11%)        | 323 (12%)        |

Abbreviations – IHD: ischaemic heart disease; COPD: chronic obstructive pulmonary disease; eGFR: estimated glomerular filtration rate; GI: gastrointestinal; ECG: electrocardiogram; AF: atrial fibrillation; ACEi/ARB: angiotensin converting enzyme inhibitor/angiotensin receptor blocker; BB: beta-blocker; MRA: mineralocorticoid receptor antagonist; OAC: oral anticoagulant; NSAID: non-steroidal anti-inflammatory drugs; PPI: proton pump inhibitors; CVD: cardiovascular disease.

Presented as number and (%) or median and (Q1-Q3) for continuous variables.

Sodium-glucose Co-transporter 2 inhibitors were used in ≤1% of individuals in all categories

Blood results reported are the nadir result unless otherwise stated. The presence of any of anaemia or AF/flutter are reported.

| <b>Table S7: Characteristics of those with incident heart failure – Survivors at 31/12/2014</b><br>(all data listed on or before 31/12/2014 unless stated otherwise) |                |               |               |               |               |               |               |               |
|----------------------------------------------------------------------------------------------------------------------------------------------------------------------|----------------|---------------|---------------|---------------|---------------|---------------|---------------|---------------|
| WHO anaemia Class (Nadir 2013 to 2014)                                                                                                                               | No Hb measured | >4 above      | 3-4 above     | 1-3 above     | 0-1 above     | 0-1 below     | 1-2 below     | >2 below      |
| N=                                                                                                                                                                   | 72 (3%)        | 13 (0%)       | 69 (2%)       | 582 (21%)     | 622 (22%)     | 483 (17%)     | 390 (14%)     | 545 (20%)     |
| Age (years) in 2013                                                                                                                                                  | 68 (62-76)     | 68 (59-75)    | 66 (56-74)    | 67 (60-75)    | 72 (63-80)    | 75 (67-82)    | 77 (70-84)    | 77 (70-83)    |
| Sex (women)                                                                                                                                                          | 23 (32%)       | 7 (54%)       | 15 (22%)      | 226 (39%)     | 301 (48%)     | 252 (52%)     | 218 (56%)     | 249 (46%)     |
| Diabetes                                                                                                                                                             | 17 (24%)       | <6 (NA%)      | <6 (NA%)      | 107 (18%)     | 140 (23%)     | 120 (25%)     | 112 (29%)     | 175 (32%)     |
| IHD                                                                                                                                                                  | 52 (72%)       | <6 (NA%)      | 34 (49%)      | 359 (62%)     | 405 (65%)     | 316 (65%)     | 246 (63%)     | 344 (63%)     |
| COPD                                                                                                                                                                 | 13 (18%)       | 6 (46%)       | 16 (23%)      | 144 (25%)     | 191 (31%)     | 134 (28%)     | 107 (27%)     | 183 (34%)     |
| eGFR (last available)                                                                                                                                                | 80 (66-89)     | 78 (68-89)    | 77 (65-96)    | 76 (65-89)    | 72 (59-86)    | 67 (52-81)    | 62 (49-78)    | 62 (47-77)    |
| GI disease                                                                                                                                                           | <6 (NA%)       | 0 (0%)        | <6 (NA%)      | 28 (5%)       | 36 (6%)       | 23 (5%)       | 21 (5%)       | 70 (13%)      |
| Any cancer prior to 2013                                                                                                                                             | <6 (NA%)       | 0 (0%)        | <6 (NA%)      | 31 (5%)       | 50 (8%)       | 33 (7%)       | 37 (9%)       | 59 (11%)      |
| Any incident cancer 2013/14                                                                                                                                          | 0 (0%)         | 0 (0%)        | 0 (0%)        | <6 (NA%)      | 17 (3%)       | 14 (3%)       | 18 (5%)       | 62 (11%)      |
| <b>ECG (last result prior to 1<sup>st</sup> January 2015)</b>                                                                                                        |                |               |               |               |               |               |               |               |
| AF/Flutter                                                                                                                                                           | <6/20 (NA%)    | <6/8 (NA%)    | 15/49 (31%)   | 139/408 (34%) | 115/426 (27%) | 104/362 (29%) | 77/277 (28%)  | 130/442 (29%) |
| <b>Haemoglobin prior to 1<sup>st</sup> January 2013</b>                                                                                                              |                |               |               |               |               |               |               |               |
| Hb 4g/dL above WHO                                                                                                                                                   | <6 (NA%)       | NA            | <6 (NA%)      | 10 (2%)       | <6 (NA%)      | NA            | NA            | NA            |
| Hb 3-4g/dL above WHO                                                                                                                                                 | <6 (NA%)       | <6 (NA%)      | 17 (36%)      | 38 (8%)       | 11 (2%)       | <6 (NA%)      | <6 (NA%)      | <6 (NA%)      |
| Hb 1-3g/dL above WHO                                                                                                                                                 | 10 (22%)       | <6 (NA%)      | 19 (40%)      | 272 (60%)     | 202 (39%)     | 111 (27%)     | 51 (14%)      | 57 (12%)      |
| Hb 0-1g/dL above WHO                                                                                                                                                 | 16 (35%)       | NA            | <6 (NA%)      | 79 (18%)      | 164 (31%)     | 130 (31%)     | 79 (22%)      | 78 (16%)      |
| Anaemia prior to 2013 (% of those tested)                                                                                                                            | 14 (30%)       | NA            | <6 (NA%)      | 52 (12%)      | 139 (27%)     | 170 (41%)     | 224 (63%)     | 358 (72%)     |
| <b>Haematitic profile (Between 2013 and 2014)</b>                                                                                                                    |                |               |               |               |               |               |               |               |
| Ferritin (median (Q1-Q3))                                                                                                                                            | 298 (298-298)  | 113 (84-252)  | 164 (110-211) | 128 (64-243)  | 88 (44-178)   | 72 (29-178)   | 58 (26-142)   | 45 (20-116)   |
| Iron (median (Q1-Q3))                                                                                                                                                | NA             | 13 (12-20)    | 14 (9-21)     | 12 (9-17)     | 10 (6-15)     | 9 (6-12)      | 8 (5-11)      | 6 (4-9)       |
| Transferrin (median (Q1-Q3))                                                                                                                                         | NA             | 2.2 (1.9-2.8) | 2.4 (2.1-3.0) | 2.6 (2.3-2.8) | 2.3 (2.0-2.6) | 2.3 (2.0-2.7) | 2.3 (2.0-2.7) | 2.4 (2.0-3.0) |
| TSAT (median (Q1-Q3))                                                                                                                                                | NA             | 27 (23-29)    | 27 (17-32)    | 18 (13-29)    | 18 (11-24)    | 16 (11-21)    | 13 (9-20)     | 10 (6-17)     |
| B12 (median (Q1-Q3))                                                                                                                                                 | NA             | 412 (378-760) | 368 (222-439) | 338 (263-452) | 361 (274-477) | 352 (258-448) | 328 (248-422) | 331 (226-464) |
| Folate (median (Q1-Q3))                                                                                                                                              | NA             | 4.1 (3.0-4.8) | 3.1 (2.6-4.3) | 5.0 (3.3-6.9) | 4.3 (2.8-6.6) | 4.8 (3.3-7.3) | 4.3 (2.9-6.7) | 4.1 (2.9-6.3) |

|                                                       |                  |                  |                  |                  |                  |                  |                  |                  |
|-------------------------------------------------------|------------------|------------------|------------------|------------------|------------------|------------------|------------------|------------------|
| Serum sodium                                          | 138<br>(137-140) | 138<br>(135-140) | 137<br>(135-138) | 137<br>(135-139) | 136<br>(134-138) | 135<br>(133-138) | 135<br>(132-137) | 135<br>(131-137) |
| Albumin                                               | 38<br>(36 - 39)  | 35<br>(33 - 37)  | 35<br>(34 - 37)  | 36<br>(33 - 38)  | 34<br>(32 - 36)  | 33<br>(31 - 35)  | 32<br>(29 - 34)  | 30<br>(27 - 33)  |
| <b>Prescriptions (on 1<sup>st</sup> January 2015)</b> |                  |                  |                  |                  |                  |                  |                  |                  |
| Iron (oral)                                           | <6 (NA%)         | <6 (NA%)         | 0 (0%)           | 11 (2%)          | 17 (3%)          | 47 (10%)         | 77 (20%)         | 226 (41%)        |
| B12                                                   | <6 (NA%)         | 0 (0%)           | 0 (0%)           | 8 (1%)           | 23 (4%)          | 21 (4%)          | 19 (5%)          | 44 (8%)          |
| Folate                                                | <6 (NA%)         | <6 (NA%)         | <6 (NA%)         | 20 (3%)          | 48 (8%)          | 42 (9%)          | 63 (16%)         | 98 (18%)         |
| Loop diuretics                                        | 15 (21%)         | 6 (46%)          | 31 (45%)         | 285 (49%)        | 333 (54%)        | 308 (64%)        | 270 (69%)        | 399 (73%)        |
| ACEi/ARB                                              | 44 (61%)         | 7 (54%)          | 48 (70%)         | 451 (77%)        | 447 (72%)        | 337 (70%)        | 265 (68%)        | 338 (62%)        |
| BB                                                    | 44 (61%)         | <6 (NA%)         | 47 (68%)         | 423 (73%)        | 415 (67%)        | 332 (69%)        | 245 (63%)        | 349 (64%)        |
| MRA                                                   | <6 (NA%)         | <6 (NA%)         | 9 (13%)          | 88 (15%)         | 86 (14%)         | 90 (19%)         | 63 (16%)         | 97 (18%)         |
| Antiplatelets                                         | 40 (56%)         | 6 (46%)          | 39 (57%)         | 336 (58%)        | 397 (64%)        | 300 (62%)        | 255 (65%)        | 331 (61%)        |
| OAC                                                   | 11 (15%)         | <6 (NA%)         | 21 (30%)         | 201 (35%)        | 180 (29%)        | 143 (30%)        | 110 (28%)        | 150 (28%)        |
| NSAID                                                 | 7 (10%)          | <6 (NA%)         | 7 (10%)          | 31 (5%)          | 41 (7%)          | 28 (6%)          | 19 (5%)          | 28 (5%)          |
| Insulin                                               | <6 (NA%)         | 0 (0%)           | 0 (0%)           | 10 (2%)          | 17 (3%)          | 21 (4%)          | 20 (5%)          | 33 (6%)          |
| Other hypoglycaemics                                  | 9 (12%)          | <6 (NA%)         | <6 (NA%)         | 55 (9%)          | 96 (15%)         | 88 (18%)         | 71 (18%)         | 116 (21%)        |
| PPI/H2 antagonists                                    | 26 (36%)         | <6 (NA%)         | 26 (38%)         | 318 (55%)        | 374 (60%)        | 322 (67%)        | 305 (78%)        | 423 (78%)        |
| <b>Deaths 2015-2018</b>                               |                  |                  |                  |                  |                  |                  |                  |                  |
| All                                                   | 7 (10%)          | <6 (NA%)         | 8 (12%)          | 88 (15%)         | 147 (24%)        | 162 (34%)        | 160 (41%)        | 259 (48%)        |
| Age at death                                          | 84<br>(83-90)    | 80<br>(76-86)    | 77<br>(74-85)    | 80<br>(73-86)    | 82<br>(75-89)    | 84<br>(77-89)    | 86<br>(79-91)    | 85<br>(79-89)    |
| Cancer                                                | <6 (NA%)         | 0 (0%)           | <6 (NA%)         | 16 (18%)         | 22 (15%)         | 25 (15%)         | 24 (15%)         | 46 (18%)         |
| GI cancer                                             | 0 (0%)           | NA               | <6 (NA%)         | <6 (NA%)         | <6 (NA%)         | <6 (NA%)         | 7 (4%)           | 14 (5%)          |
| CVD                                                   | <6 (NA%)         | <6 (NA%)         | <6 (NA%)         | 33 (38%)         | 56 (38%)         | 65 (40%)         | 58 (36%)         | 105 (41%)        |
| Neuro                                                 | <6 (NA%)         | 0 (0%)           | <6 (NA%)         | 9 (10%)          | 18 (12%)         | 9 (6%)           | 22 (14%)         | 24 (9%)          |
| Chronic Resp                                          | 0 (0%)           | 0 (0%)           | <6 (NA%)         | 20 (23%)         | 31 (21%)         | 27 (17%)         | 23 (14%)         | 34 (13%)         |
| Infection                                             | 0 (0%)           | 0 (0%)           | 0 (0%)           | <6 (NA%)         | 7 (5%)           | 18 (11%)         | 15 (9%)          | 28 (11%)         |
| Other                                                 | 0 (0%)           | 0 (0%)           | 0 (0%)           | 6 (7%)           | 13 (10%)         | 18 (11%)         | 18 (11%)         | 22 (8%)          |

Abbreviations – IHD: ischaemic heart disease; COPD: chronic obstructive pulmonary disease; eGFR: estimated glomerular filtration rate; GI: gastrointestinal; ECG: electrocardiogram; AF: atrial fibrillation; ACEi/ARB: angiotensin converting enzyme inhibitor/angiotensin receptor blocker; BB: beta-blocker; MRA:

mineralocorticoid receptor antagonist; OAC: oral anticoagulant; NSAID: non-steroidal anti-inflammatory drugs; PPI: proton pump inhibitors; CVD: cardiovascular disease.

Presented as number and (%) or median and (Q1-Q3) for continuous variables.

Sodium-glucose Co-transporter 2 inhibitors were used in  $\leq 1\%$  of individuals in all categories

Blood results reported are the nadir result unless otherwise stated. The presence of any of anaemia or AF/flutter are reported.

| <b>Table S8: Characteristics of those with prevalent heart failure – Survivors at 31/12/2014<br/>(all data listed on or before 31/12/2014 unless stated otherwise)</b> |                |               |               |               |               |               |               |               |
|------------------------------------------------------------------------------------------------------------------------------------------------------------------------|----------------|---------------|---------------|---------------|---------------|---------------|---------------|---------------|
| WHO anaemia Class (Nadir 2013 to 2014)                                                                                                                                 | No Hb measured | >4 above      | 3-4 above     | 1-3 above     | 0-1 above     | 0-1 below     | 1-2 below     | >2 below      |
| N=                                                                                                                                                                     | 1,093 (12%)    | 61 (1%)       | 261 (3%)      | 2,315 (26%)   | 1,904 (21%)   | 1,402 (16%)   | 901 (10%)     | 962 (11%)     |
| Age (years) in 2013                                                                                                                                                    | 68 (61-76)     | 62 (56-70)    | 66 (59-74)    | 68 (61-76)    | 73 (65-80)    | 76 (68-81)    | 77 (69-82)    | 77 (70-83)    |
| Sex (women)                                                                                                                                                            | 350 (32%)      | 6 (10%)       | 68 (26%)      | 777 (34%)     | 857 (45%)     | 643 (46%)     | 402 (45%)     | 375 (39%)     |
| Diabetes                                                                                                                                                               | 216 (20%)      | 11 (18%)      | 63 (24%)      | 569 (25%)     | 461 (24%)     | 403 (29%)     | 286 (32%)     | 344 (36%)     |
| IHD                                                                                                                                                                    | 747 (68%)      | 39 (64%)      | 200 (77%)     | 1,746 (75%)   | 1,481 (78%)   | 1,052 (75%)   | 695 (77%)     | 749 (78%)     |
| COPD                                                                                                                                                                   | 172 (16%)      | 14 (23%)      | 68 (26%)      | 519 (22%)     | 526 (28%)     | 393 (28%)     | 274 (30%)     | 314 (33%)     |
| eGFR (last available)                                                                                                                                                  | 78 (65-91)     | 83 (69-94)    | 78 (64-90)    | 76 (64-90)    | 71 (57-85)    | 69 (53-84)    | 64 (49-79)    | 62 (47-77)    |
| GI disease                                                                                                                                                             | 37 (3%)        | <6 (NA%)      | 8 (3%)        | 89 (4%)       | 117 (6%)      | 84 (6%)       | 88 (10%)      | 122 (13%)     |
| Any cancer prior to 2013                                                                                                                                               | 55 (5%)        | <6 (NA%)      | 15 (6%)       | 138 (6%)      | 184 (10%)     | 130 (9%)      | 116 (13%)     | 113 (12%)     |
| Any incident cancer 2013/14                                                                                                                                            | <6 (NA%)       | <6 (NA%)      | <6 (NA%)      | 25 (1%)       | 30 (2%)       | 41 (3%)       | 46 (5%)       | 69 (7%)       |
| <b>ECG (last result prior to 1<sup>st</sup> January 2015)</b>                                                                                                          |                |               |               |               |               |               |               |               |
| AF/Flutter                                                                                                                                                             | 41/204 (20%)   | <6/16 (NA%)   | 23/79 (29%)   | 222/918 (24%) | 185/867 (21%) | 167/742 (23%) | 142/537 (26%) | 177/647 (27%) |
| <b>Haemoglobin prior to 1<sup>st</sup> January 2013</b>                                                                                                                |                |               |               |               |               |               |               |               |
| Hb 4g/dL above WHO                                                                                                                                                     | 17 (2%)        | 14 (26%)      | 7 (3%)        | 10 (0%)       | <6 (NA%)      | <6 (NA%)      | NA            | <6 (NA%)      |
| Hb 3-4g/dL above WHO                                                                                                                                                   | 35 (4%)        | 20 (38%)      | 50 (21%)      | 67 (3%)       | 11 (1%)       | <6 (NA%)      | <6 (NA%)      | <6 (NA%)      |
| Hb 1-3g/dL above WHO                                                                                                                                                   | 327 (41%)      | 11 (21%)      | 132 (55%)     | 1,198 (56%)   | 356 (20%)     | 121 (9%)      | 48 (6%)       | 36 (4%)       |
| Hb 0-1g/dL above WHO                                                                                                                                                   | 178 (22%)      | <6 (NA%)      | 29 (12%)      | 508 (24%)     | 740 (41%)     | 346 (26%)     | 134 (15%)     | 72 (8%)       |
| Anaemia prior to 2013 (% of those tested)                                                                                                                              | 241 (30%)      | 6 (11%)       | 20 (8%)       | 365 (17%)     | 706 (39%)     | 870 (65%)     | 684 (79%)     | 822 (88%)     |
| <b>Haematitic profile (Between 2013 and 2014)</b>                                                                                                                      |                |               |               |               |               |               |               |               |
| Ferritin (median (Q1-Q3))                                                                                                                                              | 128 (87-246)   | 146 (62-208)  | 122 (72-249)  | 109 (57-220)  | 85 (40-164)   | 72 (31-152)   | 54 (24-131)   | 43 (16-112)   |
| Iron (median (Q1-Q3))                                                                                                                                                  | 18 (15-22)     | NA            | 18 (14-23)    | 14 (10-20)    | 12 (9-16)     | 12 (8-16)     | 9 (6-13)      | 6 (4-10)      |
| Transferrin (median (Q1-Q3))                                                                                                                                           | 2.1 (1.9-2.3)  | NA            | 2.5 (2.2-2.7) | 2.5 (2.0-2.8) | 2.4 (2.0-2.7) | 2.3 (2.0-2.7) | 2.4 (2.0-2.8) | 2.3 (1.8-2.8) |
| TSAT (median Q1-Q3))                                                                                                                                                   | 33 (29-37)     | NA            | 23 (23-36)    | 23 (17-33)    | 20 (15-26)    | 19 (13-27)    | 16 (10-23)    | 11 (6-19)     |
| B12 (median (Q1-Q3))                                                                                                                                                   | 285 (192-365)  | 372 (276-476) | 350 (282-408) | 334 (255-447) | 322 (245-436) | 330 (244-452) | 316 (242-461) | 332 (237-460) |
| Folate (median (Q1-Q3))                                                                                                                                                | 8.8 (5.4-11.0) | 4.2 (2.7-5.6) | 4.0 (3.0-5.8) | 4.6 (3.3-6.8) | 4.6 (3.2-7.2) | 4.4 (3.2-7.0) | 4.6 (3.2-7.0) | 4.5 (3.1-7.2) |

|                                                       |                  |                  |                  |                  |                  |                 |                  |                  |
|-------------------------------------------------------|------------------|------------------|------------------|------------------|------------------|-----------------|------------------|------------------|
| Serum sodium                                          | 139<br>(137-140) | 138<br>(136-139) | 138<br>(136-140) | 138<br>(136-139) | 137<br>(135-139) | 136<br>(134-38) | 136<br>(133-138) | 135<br>(132-137) |
| Albumin                                               | 37<br>(36-39)    | 37<br>(35-39)    | 37<br>(35-39)    | 37<br>(35-38)    | 36<br>(33-37)    | 34<br>(32-37)   | 33<br>(30-35)    | 31<br>(28-34)    |
| <b>Prescriptions (on 1<sup>st</sup> January 2015)</b> |                  |                  |                  |                  |                  |                 |                  |                  |
| Iron (oral)                                           | 25 (2%)          | 0 (0%)           | <6<br>(NA%)      | 40 (2%)          | 77 (4%)          | 126 (9%)        | 166 (18%)        | 380<br>(40%)     |
| B12                                                   | 15 (1%)          | <6 (NA%)         | <6<br>(NA%)      | 43 (2%)          | 66 (3%)          | 78 (6%)         | 62 (7%)          | 90 (9%)          |
| Folate                                                | 26 (2%)          | <6 (NA%)         | 8 (3%)           | 95 (4%)          | 139 (7%)         | 150<br>(11%)    | 122 (14%)        | 223<br>(23%)     |
| Loop diuretics                                        | 345 (32%)        | 24 (39%)         | 94 (36%)         | 945<br>(41%)     | 899<br>(47%)     | 757<br>(54%)    | 521 (58%)        | 640<br>(67%)     |
| ACEi/ARB                                              | 818 (75%)        | 49 (80%)         | 200<br>(77%)     | 1,837<br>(79%)   | 1,483<br>(78%)   | 1,051<br>(75%)  | 609 (68%)        | 616<br>(64%)     |
| BB                                                    | 747 (68%)        | 42 (69%)         | 199<br>(76%)     | 1,645<br>(71%)   | 1,316<br>(69%)   | 891<br>(64%)    | 591 (66%)        | 574<br>(60%)     |
| MRA                                                   | 73 (7%)          | 6 (10%)          | 28 (11%)         | 269<br>(12%)     | 216<br>(11%)     | 201<br>(14%)    | 115 (13%)        | 129<br>(13%)     |
| Antiplatelets                                         | 684 (63%)        | 33 (54%)         | 170<br>(65%)     | 1,482<br>(64%)   | 1,289<br>(68%)   | 887<br>(63%)    | 575 (64%)        | 572<br>(59%)     |
| OAC                                                   | 192 (18%)        | 19 (31%)         | 81 (31%)         | 602<br>(26%)     | 456<br>(24%)     | 375<br>(27%)    | 245 (27%)        | 278<br>(29%)     |
| NSAID                                                 | 40 (4%)          | <6 (NA%)         | 10 (4%)          | 134 (6%)         | 126 (7%)         | 89 (6%)         | 54 (6%)          | 57 (6%)          |
| Insulin                                               | 29 (3%)          | <6 (NA%)         | 8 (3%)           | 71 (3%)          | 80 (4%)          | 76 (5%)         | 66 (7%)          | 76 (8%)          |
| Other hypoglycaemics                                  | 132 (12%)        | 7 (11%)          | 35 (13%)         | 345<br>(15%)     | 299<br>(16%)     | 286<br>(20%)    | 172 (19%)        | 241<br>(25%)     |
| PPI/H2 antagonists                                    | 427 (39%)        | 31 (51%)         | 119<br>(46%)     | 1,294<br>(56%)   | 1,210<br>(64%)   | 955<br>(68%)    | 653 (72%)        | 758<br>(79%)     |
| <b>Deaths 2015-2018</b>                               |                  |                  |                  |                  |                  |                 |                  |                  |
| All                                                   | 142 (13%)        | 7 (11%)          | 32 (12%)         | 345<br>(15%)     | 401<br>(21%)     | 376<br>(27%)    | 295 (33%)        | 432<br>(45%)     |
| Age at death                                          | 84<br>(74 - 89)  | 59<br>(57 - 60)  | 74<br>(67 - 82)  | 81<br>(74 - 88)  | 83<br>(77 - 90)  | 84<br>(78 - 90) | 84<br>(77 - 90)  | 83<br>(77 - 89)  |
| Cancer                                                | 22 (15%)         | <6 (NA%)         | <6<br>(NA%)      | 72 (21%)         | 60 (15%)         | 55 (15%)        | 47 (16%)         | 85 (20%)         |
| GI cancer                                             | 8 (6%)           | 0 (0%)           | <6<br>(NA%)      | 14 (4%)          | 14 (3%)          | 12 (3%)         | 14 (5%)          | 27 (6%)          |
| CVD                                                   | 51 (36%)         | <6 (NA%)         | 15 (47%)         | 129<br>(37%)     | 164<br>(41%)     | 155<br>(41%)    | 129 (44%)        | 149<br>(34%)     |
| Neuro                                                 | 22 (15%)         | 0 (0%)           | 6 (19%)          | 38 (11%)         | 47 (12%)         | 39 (10%)        | 43 (15%)         | 37 (9%)          |
| Chronic Resp                                          | 15 (11%)         | 0 (0%)           | <6<br>(NA%)      | 47 (14%)         | 65 (16%)         | 48 (13%)        | 32 (11%)         | 55 (13%)         |
| Infection                                             | 15 (11%)         | 0 (0%)           | <6<br>(NA%)      | 28 (8%)          | 37 (9%)          | 32 (9%)         | 24 (8%)          | 48 (11%)         |
| Other                                                 | 17 (12%)         | <6 (NA%)         | <6<br>(NA%)      | 31 (9%)          | 28 (7%)          | 47 (12%)        | 20 (7%)          | 58 (14%)         |

Abbreviations – IHD: ischaemic heart disease; COPD: chronic obstructive pulmonary disease; eGFR: estimated glomerular filtration rate; GI: gastrointestinal; ECG: electrocardiogram; AF: atrial fibrillation; ACEi/ARB: angiotensin converting enzyme inhibitor/angiotensin receptor blocker; BB: beta-blocker; MRA:

mineralocorticoid receptor antagonist; OAC: oral anticoagulant; NSAID: non-steroidal anti-inflammatory drugs; PPI: proton pump inhibitors; CVD: cardiovascular disease.

Presented as number and (%) or median and (Q1-Q3) for continuous variables.

Sodium-glucose Co-transporter 2 inhibitors were used in  $\leq 1\%$  of individuals in all categories

Blood results reported are the nadir result unless otherwise stated. The presence of any of anaemia or AF/flutter are reported.

| Hb concentration<br>By W.H.O<br>grade | Sex    | <60<br>years | 60-70<br>years | P<br>values:<br>sex | 70-80<br>years | >80<br>years   | P<br>values:<br>sex | P<br>values:<br>age<br>groups | Total<br>number<br>of<br>patients |
|---------------------------------------|--------|--------------|----------------|---------------------|----------------|----------------|---------------------|-------------------------------|-----------------------------------|
| >1g/dL above                          | Female | 754<br>(6%)  | 630<br>(6%)    | p<0.001             | 560<br>(7%)    | 436<br>(11%)   | p<0.001             | p<0.001                       | 34,907                            |
|                                       | Male   | 592<br>(5%)  | 496<br>(4%)    |                     | 349<br>(5%)    | 131<br>(7%)    |                     |                               | 33,008                            |
| 0-1g/dL above                         | Female | 559<br>(9%)  | 568<br>(9%)    | P<0.001             | 766<br>(12%)   | 614<br>(14%)   | p<0.001             | p<0.001                       | 23,059                            |
|                                       | Male   | 327<br>(8%)  | 391<br>(8%)    |                     | 347<br>(8%)    | 210<br>(11%)   |                     |                               | 15,236                            |
| 0-1g/dL below                         | Female | 487<br>(21%) | 607<br>(22%)   | p=0.003             | 958<br>(24%)   | 913<br>(24%)   | p=0.784             | p<0.007                       | 12,933                            |
|                                       | Male   | 360<br>(25%) | 566<br>(24%)   |                     | 687<br>(25%)   | 388<br>(23%)   |                     |                               | 8,294                             |
| 1-2g/dL below                         | Female | 388<br>(40%) | 605<br>(42%)   | p<0.001             | 1,014<br>(45%) | 1,114<br>(44%) | P<0.001             | p=0.01                        | 7,213                             |
|                                       | Male   | 266<br>(35%) | 432<br>(33%)   |                     | 632<br>(35%)   | 462<br>(34%)   |                     |                               | 5,218                             |
| >2g/dL below                          | Female | 424<br>(49%) | 668<br>(52%)   | p=0.019             | 1,188<br>(55%) | 1,327<br>(56%) | p<0.001             | p=0.005                       | 6,695                             |
|                                       | Male   | 416<br>(46%) | 775<br>(48%)   |                     | 1,135<br>(46%) | 967<br>(49%)   |                     |                               | 6,946                             |

Abbreviations:- Hb: haemoglobin

In comparing differences in testing patterns between age groups (<70 years vs ≥70 years), the total number of patients in each age group, irrespective of sex, were compared.

In comparing differences in testing patterns between patients' sex, age groups were combined to compare testing patterns in those <70 years and those ≥70 years.



| Table S10: Number and % of patients with TSAT test by haemoglobin concentration according to age and sex |        |           |             |               |             |           |               |                      |                          |
|----------------------------------------------------------------------------------------------------------|--------|-----------|-------------|---------------|-------------|-----------|---------------|----------------------|--------------------------|
| Hb concentration By W.H.O grade                                                                          | Sex    | <60 years | 60-70 years | P values: sex | 70-80 years | >80 years | P values: sex | P values: age groups | Total number of patients |
| >1g/dL above                                                                                             | Female | 157 (1%)  | 144 (1%)    | p = 1         | 111 (1%)    | 112 (3%)  | P=0.39        | p<0.001              | 34,907                   |
|                                                                                                          | Male   | 178 (1%)  | 152 (1%)    |               | 91 (1%)     | 44 (2%)   |               |                      | 33,008                   |
| 0-1g/dL above                                                                                            | Female | 104 (2%)  | 113 (2%)    | p=0.002       | 156 (2%)    | 173 (4%)  | p=0.006       | p<0.001              | 23,059                   |
|                                                                                                          | Male   | 107 (3%)  | 112 (2%)    |               | 84 (2%)     | 57 (3%)   |               |                      | 15,236                   |
| 0-1g/dL below                                                                                            | Female | 91 (4%)   | 137 (5%)    | p<0.001       | 225 (6%)    | 239 (6%)  | p=0.75        | p<0.001              | 12,933                   |
|                                                                                                          | Male   | 98 (7%)   | 142 (6%)    |               | 165 (6%)    | 106 (6%)  |               |                      | 8,294                    |
| 1-2g/dL below                                                                                            | Female | 111 (12%) | 161 (11%)   | p=1           | 294 (13%)   | 403 (16%) | P<0.001       | p=0.01               | 7,213                    |
|                                                                                                          | Male   | 82 (11%)  | 154 (12%)   |               | 188 (11%)   | 152 (11%) |               |                      | 5,218                    |
| >2g/dL below                                                                                             | Female | 172 (20%) | 265 (21%)   | p=0.838       | 434 (20%)   | 556 (23%) | p=0.13        | p=0.39               | 6,695                    |
|                                                                                                          | Male   | 195 (22%) | 324 (20%)   |               | 472 (19%)   | 434 (22%) |               |                      | 6,946                    |

Abbreviations:- Hb: haemoglobin

In comparing differences in testing patterns between age groups (<70 years vs ≥70 years), the total number of patients in each age group, irrespective of sex, were compared.

In comparing differences in testing patterns between patients' sex, age groups were combined to compare testing patterns in those <70 years and those ≥70 years.



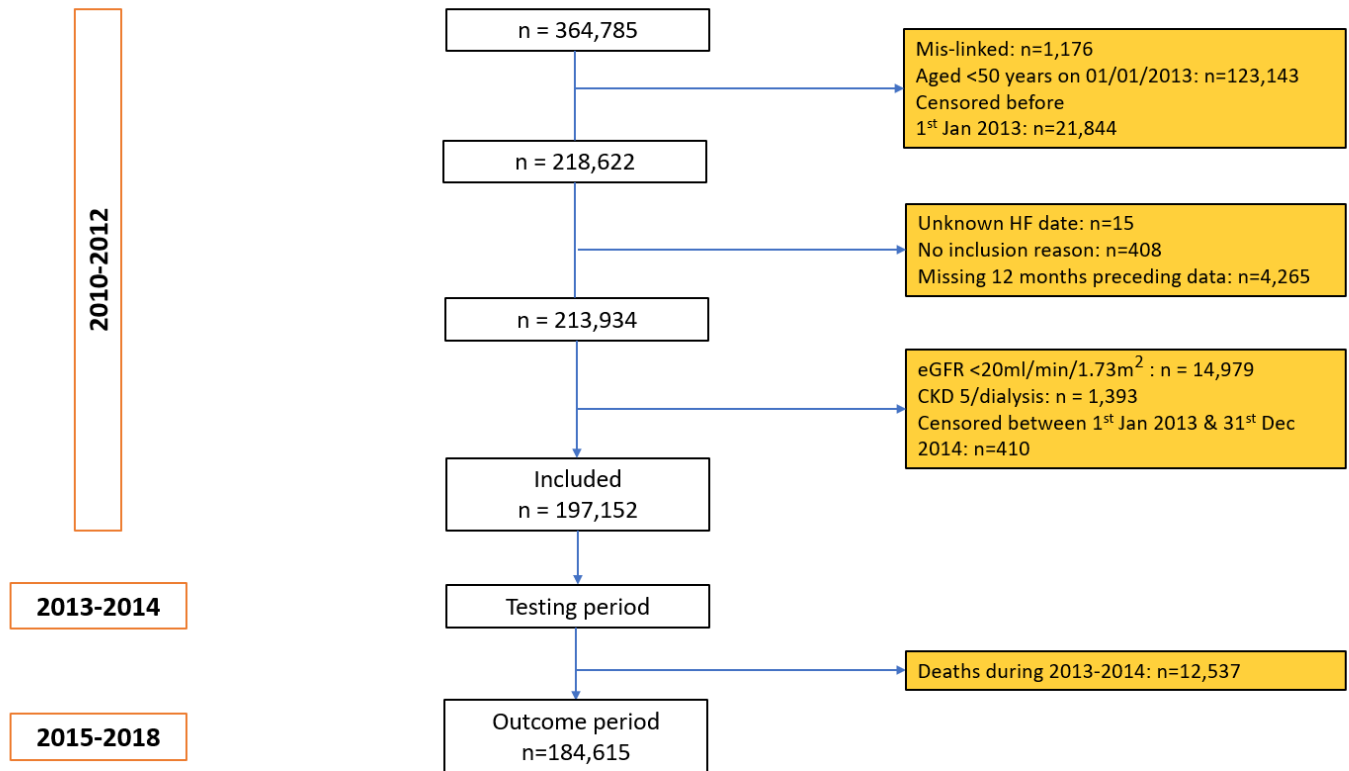

**Figure S1:** STROBE diagram of included participants. Exclusions with number and (%) of each are presented in boxes on the right-hand panel. Panels on the left indicate the year(s) of each part of the study.

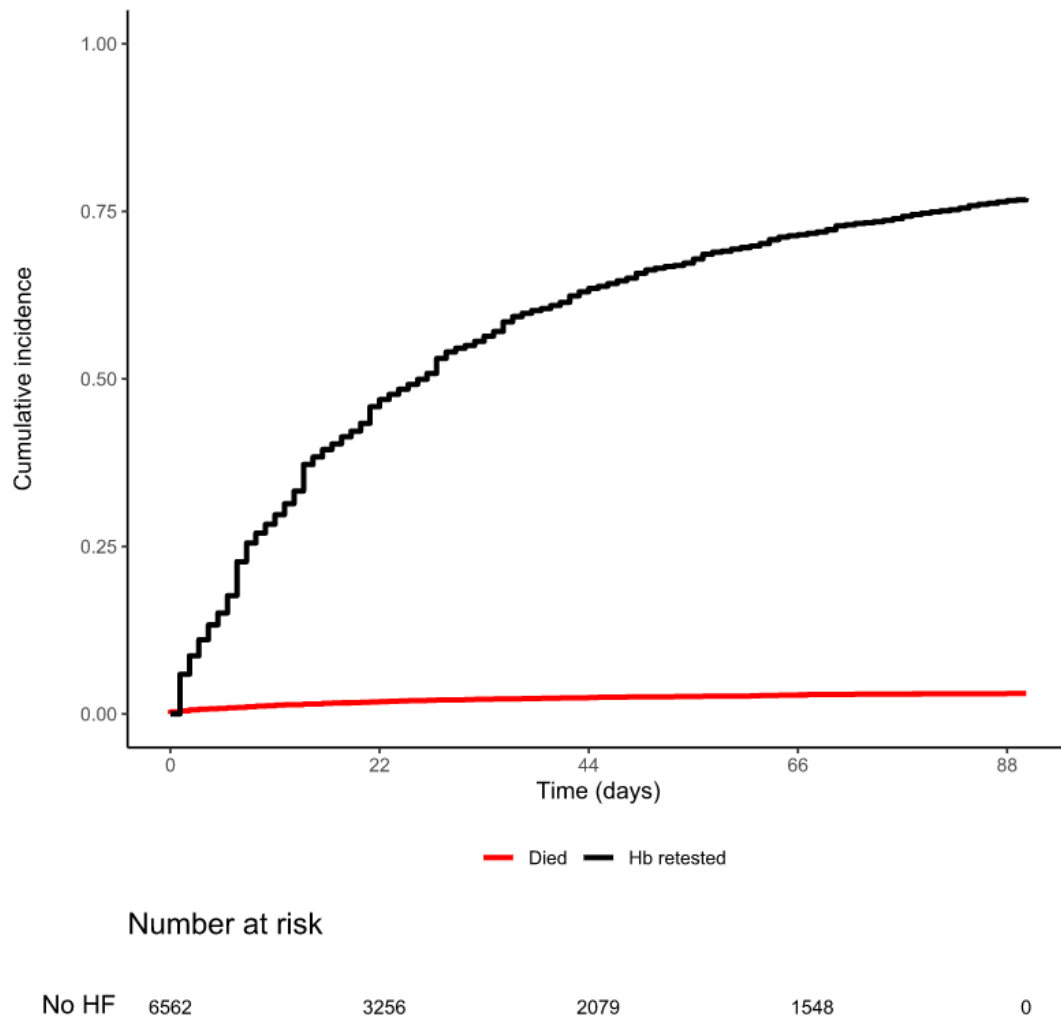

**Figure S2:** Cumulative incidence plots of rates of re-testing of haemoglobin (black) and all-cause mortality (red) following a diagnosis of severe anaemia (<2g/dL below W.H.O.) between 2013/14 in those without a history of heart failure.

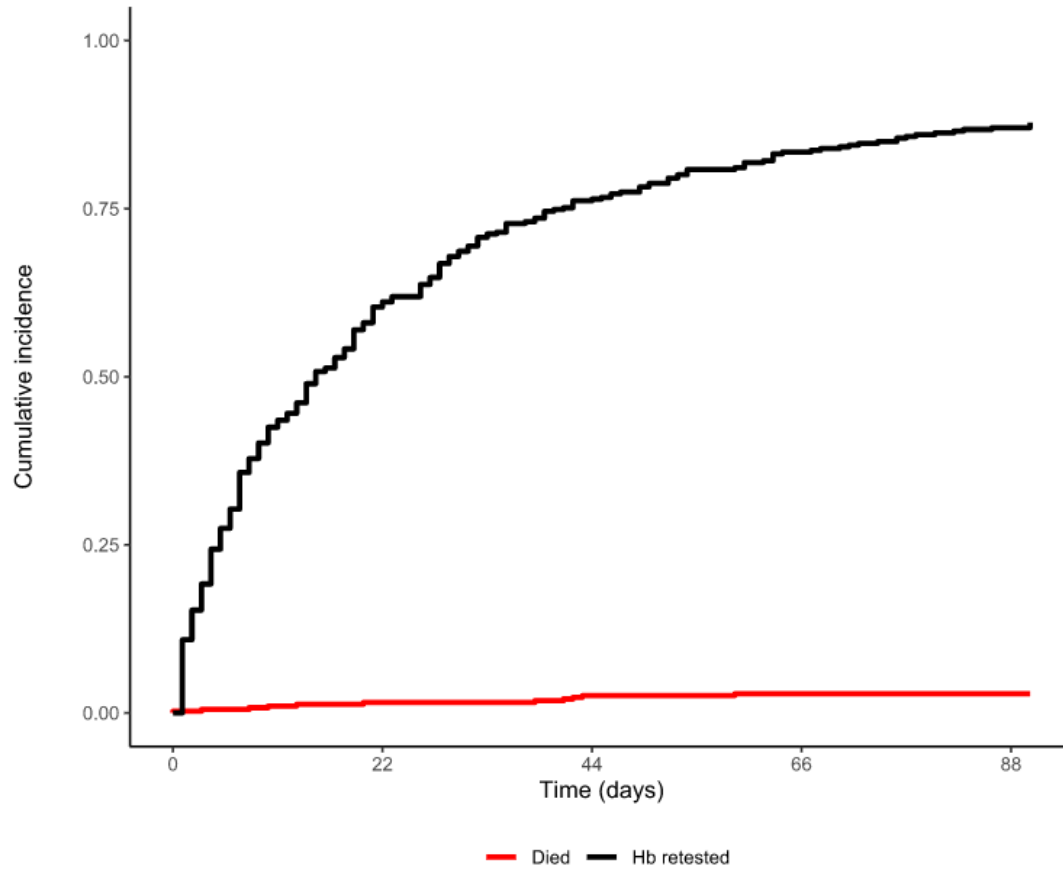

## Number at risk

|        |     |     |    |    |   |
|--------|-----|-----|----|----|---|
| Inc HF | 386 | 141 | 74 | 47 | 0 |
|--------|-----|-----|----|----|---|

**Figure S3:** Cumulative incidence plots of rates of re-testing of haemoglobin (black) and all-cause mortality (red) following a diagnosis of severe anaemia (<2g/dL below W.H.O.) between 2013/14 in those with incident heart failure.

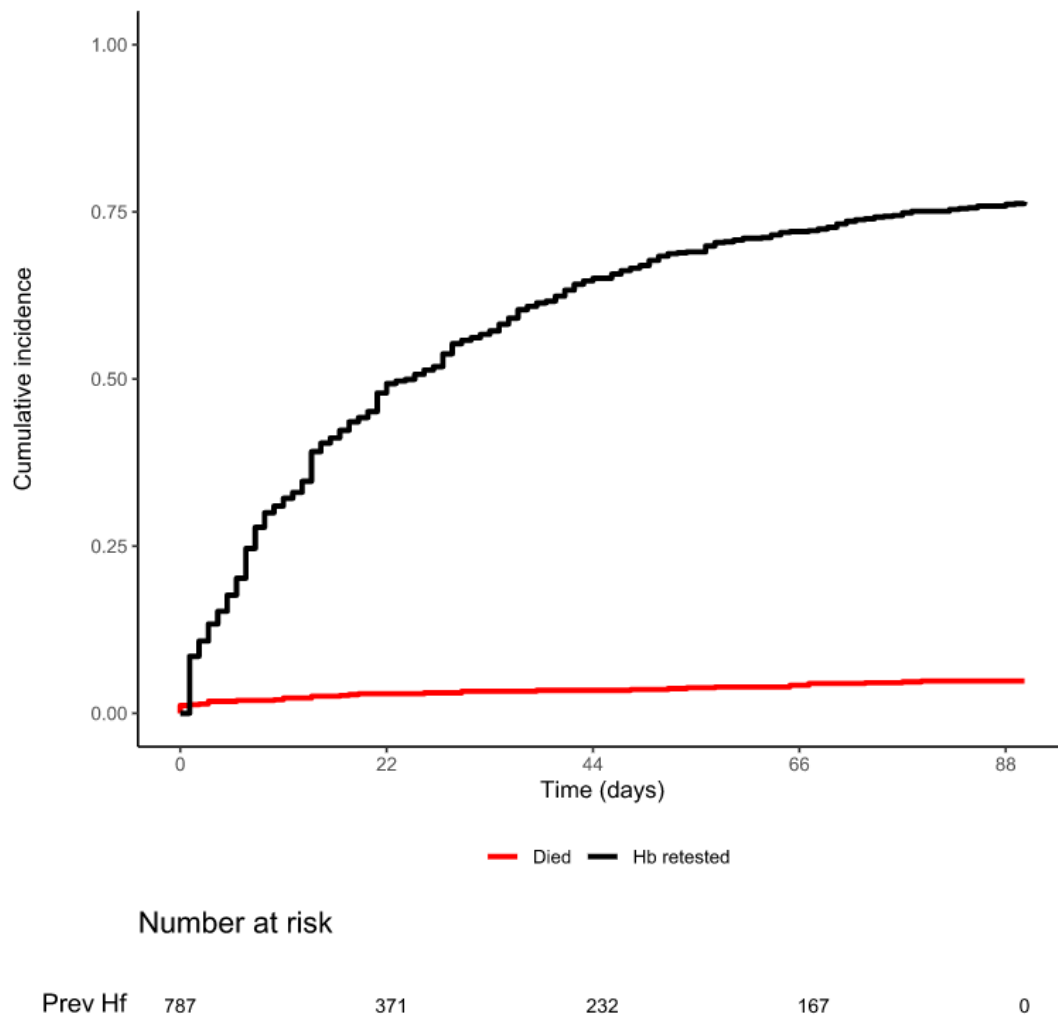

**Figure S4:** Cumulative incidence plots of rates of re-testing of haemoglobin (black) and all-cause mortality (red) following a diagnosis of severe anaemia (<2g/dL below W.H.O.) between 2013/14 in those with prevalent heart failure.

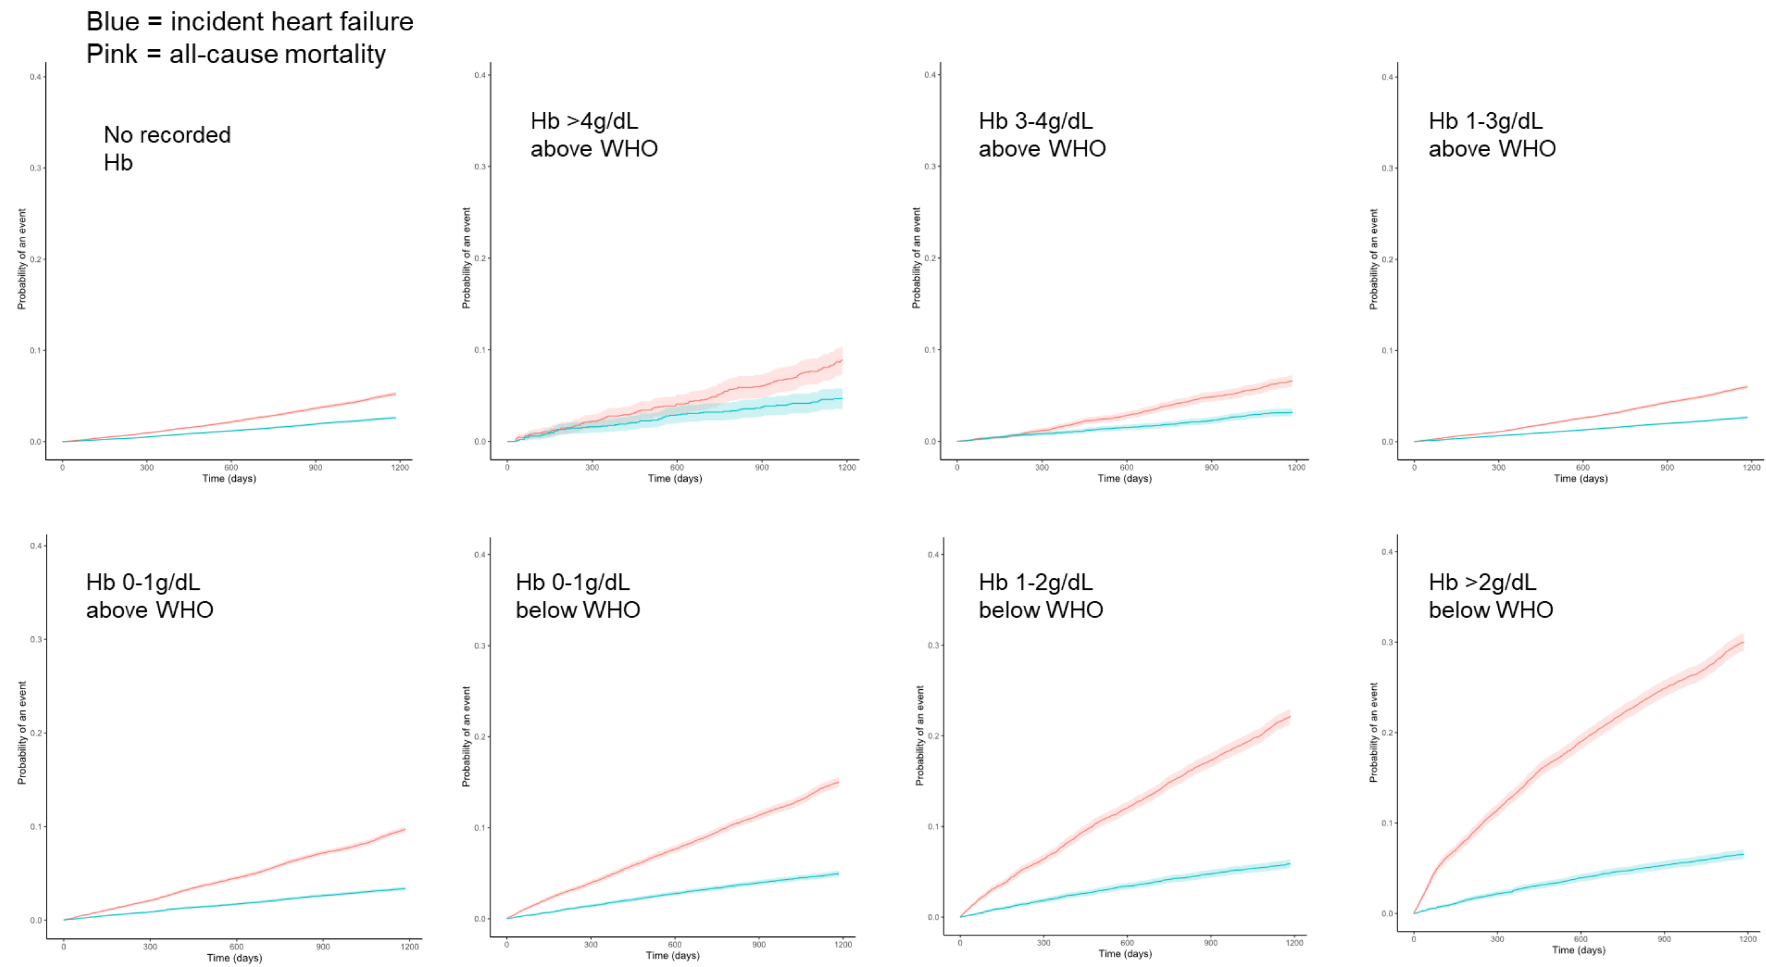

**Figure S5:** Cumulative incidence curves of incident heart failure (blue) and all-cause mortality (pink). Associated 95% Confidence Intervals from 1<sup>st</sup> January 2015 to 31<sup>st</sup> March 2018 by haemoglobin concentration for patients who survived, free of heart failure up to 31<sup>st</sup> December 2014. Hb: haemoglobin; W.H.O.: World Health Organization

## A

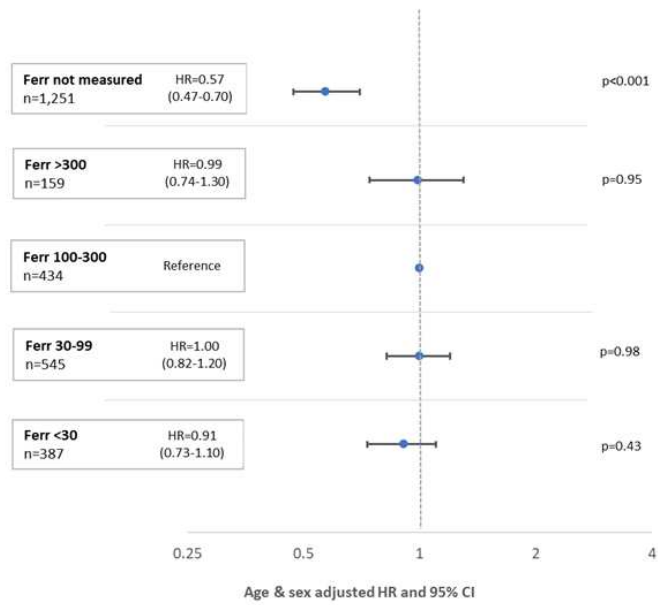

## B

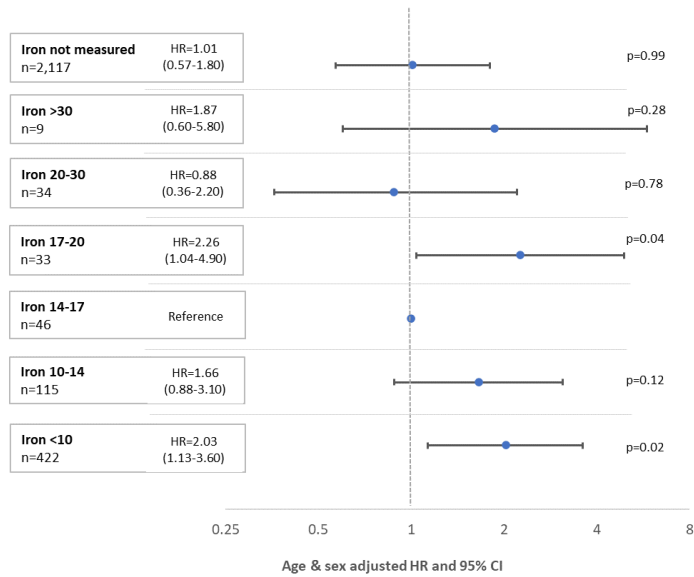



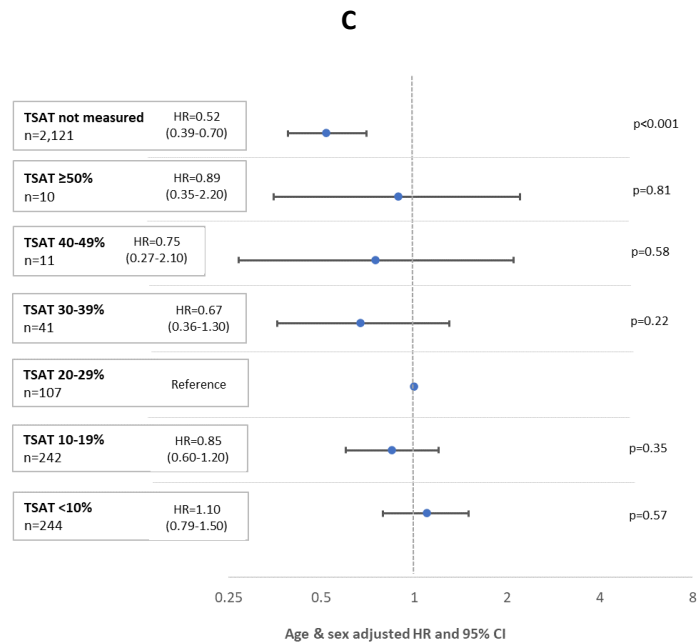

**Figure S6:** Forest plots showing all-cause mortality from 1<sup>st</sup> January 2015 to 31<sup>st</sup> March 2018 in surviving patients with incident heart failure during 2013/14 according to concentrations of serum ferritin (A) (Not measured; >300 µg/L; 100-300 µg/L; 30-100 µg/L; <30 µg/L), serum iron (B) (Not measured; >30 µmol/L; 20-30 µmol/L; 17-20 µmol/L; 14-17 µmol/L; 10-14 µmol/L; <10 µmol/L) and transferrin saturation (TSAT) (C) (Not measured; ≥50%; 40-49%; 30-39%; 20-29%; 10-19%; <10%).

## A

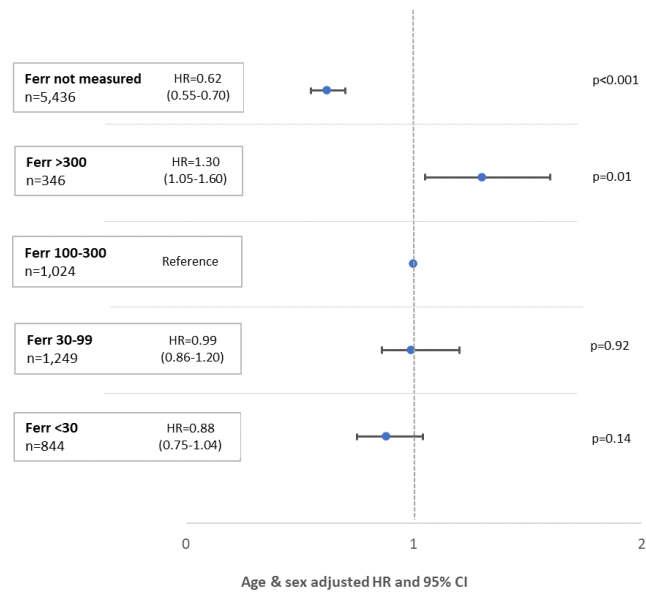

## B

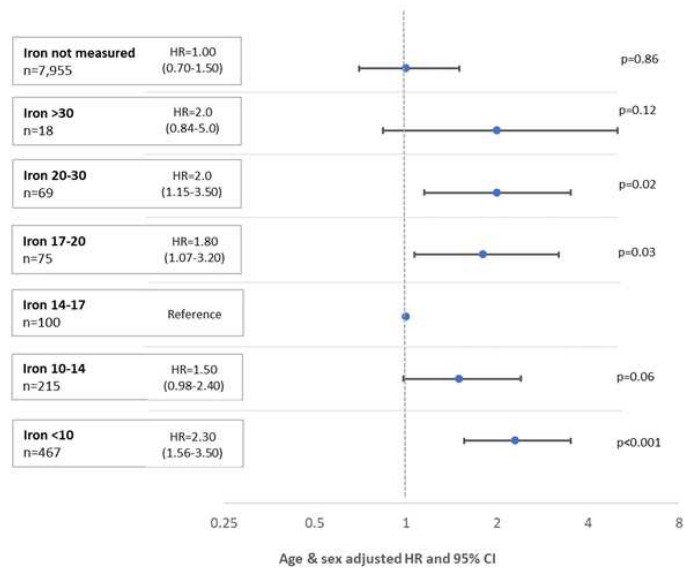

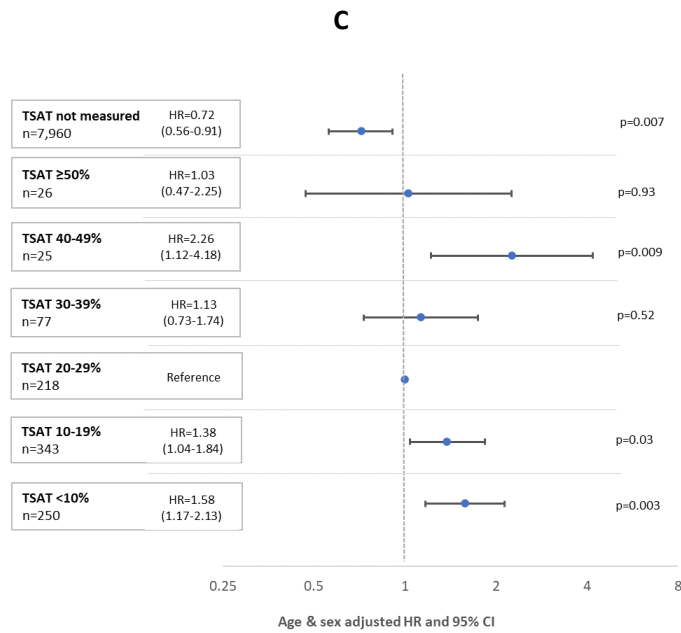

**Figure S7:** Forest plots showing all-cause mortality from 1<sup>st</sup> January 2015 to 31<sup>st</sup> March 2018 in surviving patients with prevalent heart failure during 2013/14 according to concentrations of serum ferritin (A) (Not measured; >300 µg/L; 100-300 µg/L; 30-100 µg/L; <30 µg/L), serum iron (B) (Not measured; >30 µmol/L; 20-30 µmol/L; 17-20 µmol/L; 14-17 µmol/L; 10-14 µmol/L; <10 µmol/L) and transferrin saturation (TSAT) (C) (Not measured; ≥50%; 40-49%; 30-39%; 20-29%; 10-19%; <10%).

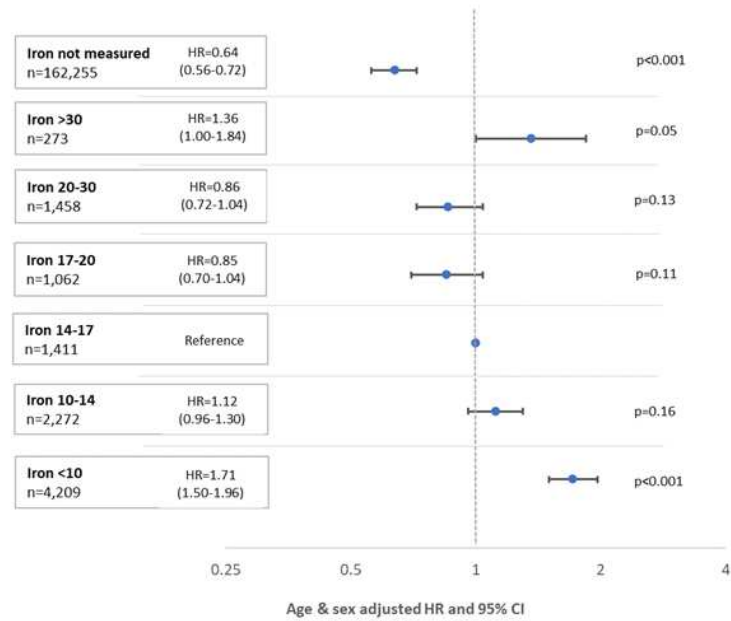

**Figure S8:** Forest plots showing all-cause mortality from 1<sup>st</sup> January 2015 to 31<sup>st</sup> March 2018 in surviving patients without a history of heart failure during, or prior to, 2013/14 according to concentrations of serum iron (Not measured; >30  $\mu\text{mol/L}$ ; 20-30  $\mu\text{mol/L}$ ; 17-20  $\mu\text{mol/L}$ ; 14-17  $\mu\text{mol/L}$ ; 10-14  $\mu\text{mol/L}$ ; <10  $\mu\text{mol/L}$ ).
